1 **Attachment of the RNA degradosome to the inner cytoplasmic membrane of *Escherichia coli***  
2 **prevents wasteful degradation of rRNA intermediates in ribosome assembly.**

3  
4  
5 Lydia Hadjeras<sup>1,4</sup>, Marie Bouvier<sup>1</sup>, Isabelle Canal<sup>1</sup>, Leonora Poljak<sup>1</sup>, Quentin Morin-Ogier<sup>1,5</sup>,  
6 Carine Froment<sup>2,6</sup>, Odile Burlet-Schlitz<sup>2,6</sup>, Lina Hamouche<sup>1</sup>, Laurence Girbal<sup>3</sup>, Muriel Cocaign-  
7 Bousquet<sup>3</sup> and Agamemnon J. Carpousis<sup>1,3†</sup>

8  
9  
10 <sup>1</sup>LMGM, Université de Toulouse, CNRS, UPS, CBI, Toulouse, France

11 <sup>2</sup>IPBS, Université de Toulouse, CNRS, UPS, Toulouse, France

12 <sup>3</sup>TBI, Université de Toulouse, CNRS, INRAE, INSA, Toulouse, France

13 <sup>4</sup>IMIB, University of Würzburg, 97080 Würzburg, Germany.

14 <sup>5</sup>Lesaffre, Food Production, Lille, France

15 <sup>6</sup>Infrastructure Nationale de Protéomique, ProFI, FR 2048, Toulouse, France

16

17 Running title: Quality control of ribosome assembly in *Escherichia coli*

18

19

20 †Corresponding author: [agamemnon.carpousis@univ-tlse3.fr](mailto:agamemnon.carpousis@univ-tlse3.fr)

21

22

23 **Background:** RNase E has crucial roles in the initiation of mRNA degradation, the processing of  
24 ‘stable’ transcripts such as rRNA and tRNA, and the quality control of ribosomes. With over  
25 20’000 potential cleavage sites, RNase E is a low specificity endoribonuclease with the capacity to  
26 cleave multiple times nearly every transcript in the cell. A large noncatalytic region in the C-  
27 terminal half of RNase E is the scaffold for assembly of the multienzyme RNA degradosome. The  
28 components of the RNA degradosome cooperate in the degradation of mRNA to  
29 oligoribonucleotides, which are then degraded to nucleotides by oligoribonuclease. Over the past  
30 decade, compelling evidence has emerged that the RNA degradosome is attached to the  
31 phospholipid bilayer of the inner cytoplasmic membrane by the Membrane Targeting Sequence  
32 (MTS), which is a 15-residue amphipathic alpha-helix located in the noncatalytic region of RNase  
33 E. Systematic proteomic analyses have identified RNase E as an inner membrane protein that can  
34 only be solubilized by disrupting the phospholipid bilayer with detergent. Important components  
35 of the mRNA degradation machinery are therefore membrane-attached. The reason for this cellular  
36 localization has until now been a mystery.

37  
38 **Results:** We have constructed and characterized the *rneΔMTS* strain expressing ncRNase E  
39 (nucleoid-cytoplasmic-RNase E), which is a soluble variant that is uniformly distributed in the  
40 interior of the cell. In the mutant strain, there is a slowdown in the rates of growth and mRNA  
41 degradation. Surprisingly, we have identified aberrant 20S and 40S ribosomal particles in the  
42 *rneΔMTS* strain that contain, respectively, precursors of 16S and 23S rRNA that have been  
43 ‘nicked’ by ncRNase E. We have mapped ncRNase E cleavages of rRNA sites *in vivo* and *in vitro*.  
44 Although intact ribosomes are resistant to RNase E cleavage *in vitro*, protein-free rRNA is readily  
45 degraded by RNase E. Ribosomes partially unfolded *in vitro* are also susceptible to RNase E  
46 cleavage. *In vivo* and *in vitro* rRNA cleavages map to the same sites. The sequence of the cleavage  
47 sites matches the RNase E consensus sequence previously determined by a transcriptomic analysis  
48 that did not include rRNA. Construction of additional mutant strains demonstrated *in vivo* that  
49 fragments of 16S and 23S rRNA as well as a precursor of 5S rRNA are degraded in a pathway  
50 involving 3’ oligoadenylation and exonucleolytic digestion. A proteomic analysis showed that 17  
51 small subunit proteins are underrepresented in the 20S particle and 21 large subunit proteins are  
52 underrepresented in the 40S particle.

53  
54 **Conclusions:** Ribosome biogenesis is a complex process in which ‘early’ ribosomal proteins bind  
55 co-transcriptionally to nascent rRNA. Ribonucleoprotein intermediates are released from  
56 chromatin by RNase III cleavage. Maturation continues with the addition of ‘late’ proteins

57 resulting in the compact rRNA structures found in mature 30S and 50S ribosomal subunits.  
58 Considering our experimental results, we propose that the physical separation of rRNA  
59 transcription in the nucleoid from the RNA degradosome on the inner cytoplasmic membrane  
60 protects intermediates in ribosome assembly from degradation. A corollary is that quality control  
61 normally occurs when defective ribosomal particles interact with the membrane-attached RNA  
62 degradosome. The rRNA degradation pathway described here is the same as described previously  
63 for RNase E-dependent degradation of mRNA and quality control of ribosomes. Since the pathway  
64 for rRNA degradation is the same as the pathway for mRNA degradation, the slowdown of mRNA  
65 degradation in the *rneΔMTS* strain could be due to competition by rRNA degradation. Since  
66 growth rate is limited by ribosome synthesis rate, the slow growth of the *rneΔMTS* strain is likely  
67 due to wasteful degradation of a proportion of newly synthesized rRNA. Although r-proteins  
68 released by rRNA degradation could be recycled, this point has not been addressed experimentally.  
69 Avoiding a futile cycle in which rRNA intermediates in ribosome assembly are degraded could  
70 explain why localization of RNase E homologues to the inner cytoplasmic membrane is conserved  
71 throughout the  $\beta$ - and  $\gamma$ -Proteobacteria.

72  
73 **Importance:** In *E. coli*, transcription in the nucleoid, translation in the cytoplasm and initiation of  
74 mRNA degradation on the inner cytoplasmic membrane are physically separated. Despite the lack  
75 of internal membranes, this separation can be viewed as a compartmentalization of the bacterial  
76 cell. Our work shows that the inner membrane localization of the RNA degradosome restricts  
77 access of RNase E to intermediates in ribosome assembly. Thus, as in the eukaryotic cell, the  
78 architecture of the bacterial cell has an important role in the organization of cellular processes such  
79 as ribosome biogenesis, ribosome quality control, and mRNA degradation.

80  
81 **Key words:** inner membrane protein, ribosome assembly, ribosome quality control, RNA  
82 degradosome, RNase E

83

## 84 **Introduction.**

85

86 *E. coli* RNase E is the founding member of a large family of endoribonucleases that are widely  
87 distributed in bacteria and plants (Ait-Bara and Carpousis 2015; Ait-Bara et al. 2015). The N-  
88 terminal half of each subunit folds into a compact globular structure that forms the catalytic  
89 domain, while the C-terminal noncatalytic region is predominantly natively unstructured protein  
90 (Callaghan et al. 2004; Callaghan et al. 2005; Marcaida et al. 2006). The noncatalytic region has  
91 small motifs (15-40 residues) known as microdomains or SLiMs (Small Linear Motifs), which  
92 serve as sites of interaction with proteins, RNA, and phospholipid bilayers (Marcaida et al. 2006;  
93 Khemici et al. 2008; Ait-Bara and Carpousis 2015; Ait-Bara et al. 2015). The exoribonuclease  
94 PNPase, the glycolytic enzyme enolase, and the DEAD-box RNA helicase RhlB bind to RNase E  
95 microdomains to form the multienzyme RNA degradosome (Carpousis et al. 1994; Miczak et al.  
96 1996; Py et al. 1996; Vanzo et al. 1998; Carpousis 2007). Another microdomain, known as the  
97 MTS (Membrane Targeting Sequence), forms a 15-residue amphipathic alpha-helix that binds to  
98 phospholipid bilayers (Khemici et al. 2008; Strahl et al. 2015). Protein sequence comparisons have  
99 shown that RNase E homologs in the  $\gamma$ -Proteobacteria have a conserved N-terminal catalytic  
100 domain and a large natively unstructured C-terminal half with microdomains that include a  
101 conserved MTS (Ait-Bara et al. 2015). MTS-like microdomains have also been identified in  
102 RNase E homologs in  $\beta$ -Proteobacteria (Khemici et al. 2008).

103

104 Epifluorescence and super-resolution microscopy of live cells has shown that RNase E is mostly  
105 localized to the periphery of the cell with very low levels inside the cell (Khemici et al. 2008;  
106 Strahl et al. 2015; Moffitt et al. 2016). Furthermore, systematic analyses of the inner membrane  
107 proteome have shown that RNase E is an inner membrane protein (IMP) that can only be  
108 solubilized by treatment with detergents that disrupt the phospholipid bilayer (Papanastasiou et al.  
109 2013; Papanastasiou et al. 2016). For clarity, we will refer to wild type RNase E as imRNase E  
110 (inner-membrane-RNase E). As evidenced by epifluorescence and TIRF microscopy, imRNase E  
111 forms short-lived clusters (puncta) on the inner cytoplasmic membrane (Strahl et al. 2015;  
112 Hamouche et al. 2021a). RhlB and PNPase have been shown to display the same localization and  
113 dynamics as imRNase E thus confirming the association of these enzymes in live cells (Hamouche  
114 et al. 2021a). RNA degradosomes appear to move on the inner cytoplasmic membrane, but this  
115 movement could be an illusion due to the rapid formation and dissociation of puncta over a few  
116 seconds. Inhibition of transcription by rifampicin results in the depletion of mRNA, precursors of  
117 rRNA and tRNA, and the disassembly of RNA degradosome puncta suggesting that RNA

118 substrate is required for clustering (Strahl et al. 2015; Hamouche et al. 2021a). However, recent  
119 work with kasugamycin, which inhibits the initiation of translation, also results in the disassembly  
120 of RNA degradosome puncta (Hamouche et al. 2021a). Although there is a low-level translation of  
121 leaderless mRNA in the presence of kasugamycin, velocity sedimentation analyses showed that  
122 polyribosomes are not formed (Kaberina et al. 2009; Muller et al. 2016). Since transcription  
123 continues in the presence of kasugamycin, and ribosome-free mRNA and precursors of rRNA and  
124 tRNA continue to be synthesized, the formation of RNA degradosome puncta was therefore  
125 proposed to be due to an interaction with polyribosomes. Biochemical work has shown that the  
126 RNA degradosome binds ribosomes and polyribosomes thus supporting a direct interaction (Tsai  
127 et al. 2012). Taken together, the experimental work suggests that puncta are sites of mRNA  
128 degradation in which the initial step involves the capture of polyribosomes by the RNA  
129 degradosome.

130

131 Recent work suggests that the RNA degradosome can be displaced from the inner cytoplasmic  
132 membrane under conditions of stress. Upon transition from aerobic to anaerobic growth, cells  
133 filament and RNase E localizes to the interior of the cell in a diffuse pattern (Murashko and Lin-  
134 Chao 2017). Starvation of *E. coli* for a nitrogen source results in the formation of a single large  
135 focus of RNase E (McQuail et al. 2021). Treatment of cells with the protein synthesis inhibitor  
136 chloramphenicol results in the formation of foci of RNase E that are not attached to the inner  
137 cytoplasmic membrane (Hamouche et al. 2021a). These results suggest that stress-induced  
138 detachment of RNase E from the inner membrane could control RNase E activity or accessibility  
139 to RNA substrates.

140

141 Although RNase E is an essential enzyme in *E. coli*, mutant strains encoding variants in which part  
142 or all of the C-terminal region is deleted are viable (Vanzo et al. 1998; Lopez et al. 1999; Ow et al.  
143 2000; Leroy et al. 2002). Binding to the inner cytoplasmic membrane of *E. coli* is disrupted in  
144 mutant strains in which the amphipathic  $\alpha$ -helix formed by the MTS has been mutated by amino  
145 acid substitution or deletion (Khemici et al. 2008). In the *rne*( $\Delta$ MTS) background, ncRNase E  
146 localizes uniformly to the interior of the cell (Khemici et al. 2008; Strahl et al. 2015; Moffitt et al.  
147 2016). The *rne*( $\Delta$ MTS) strain exhibits a slow-growth phenotype, a slowdown of mRNA  
148 degradation, and accelerated degradation of ribosome-free mRNA (Hadjeras et al. 2019). Although  
149 a previous study proposed that membrane localization of RNase E preferentially destabilizes  
150 mRNA encoding inner membrane proteins (Moffitt et al. 2016), this preference was not considered  
151 statistically significant in a subsequent study (Hadjeras et al. 2019), which concluded that the

152 slowdown in mRNA degradation is global. Here, we present experimental evidence suggesting  
153 that the slowdown in mRNA degradation is an indirect effect involving competition with the  
154 degradation of intermediates in ribosome assembly by ncRNase E.

155

156 Over the past two decades, evidence has emerged that ribosome assembly and rRNA processing  
157 are organized spatially (Bohne 2014). In *E. coli*, despite their separation by hundreds of kbp on the  
158 chromosome, most rRNA operons are in close proximity leading to the suggestion that there is a  
159 bacterial nucleolus (Gaal et al. 2016). Ribosomal RNA is transcribed as a single 30S precursor,  
160 which then undergoes extensive processing carried out by a battery of ribonucleases including  
161 RNase III and RNase E (Deutscher 2009; Shajani et al. 2011; Sulthana and Deutscher 2013; Jain  
162 2020). EM imaging of chromosome spreads showed that ribosomal proteins bind to rRNA co-  
163 transcriptionally (Miller et al. 1970). Recent work has elucidated the structure of an rRNA  
164 transcription elongation complex that promotes co-transcriptional RNA folding and r-protein  
165 binding (Huang et al. 2020). Some maturation steps, such as processing by RNase III, take place  
166 on nascent rRNA in the nucleoid. RNA FISH (Fluorescence In Situ Hybridization) showed that the  
167 5' leader sequence of 30S rRNA is localized to the nucleoid whereas the 17S precursor of 16S  
168 rRNA is localized in the cytoplasm, and that this separation is RNase III-dependent (Malagon  
169 2013). These results show that early steps in ribosome biogenesis occur co-transcriptionally in the  
170 nucleoid.

171

172 Ribosome assembly is a complex multi-step process that requires the coordinated synthesis of  
173 rRNA and r-proteins (Shajani et al. 2011; Davis and Williamson 2017). *In vivo* kinetic analyses by  
174 Lindahl revealed the existence of two intermediates in 30S assembly (p<sub>1</sub>30S and p<sub>2</sub>30S) and three  
175 intermediates in 50S assembly (p<sub>1</sub>50S, p<sub>2</sub>50S and p<sub>3</sub>50S) (Lindahl 1973). The p<sub>2</sub>30S intermediate,  
176 which co-sediments with the mature 30S subunit, contains the full complement of 21 small subunit  
177 proteins and precursor 16S rRNA. The p<sub>3</sub>50S intermediate, which co-sediments with the mature  
178 50S subunit, contains the full complement of 30 large subunit proteins and precursor 23S and 5S  
179 rRNA. The p<sub>1</sub>30S intermediate contains 10 small subunit proteins; p<sub>1</sub>50S, p<sub>2</sub>50S contain 16 and 24  
180 large subunit proteins, respectively. In addition to r-protein binding, there are a large number of  
181 ribosome assembly factors including enzymes that modify rRNA, RNA helicases and protein  
182 chaperons. Although recent work employing quantitative mass spectrometry and single-particle  
183 cryoEM structural analyses has revealed that the ribosome assembly pathways are more complex  
184 than previously believed (Shajani et al. 2011; Davis and Williamson 2017), Lindahl's scheme of

185 intermediates containing subsets of ribosomal proteins remains a generally useful framework for  
186 analyzing defects in ribosome assembly.

187

188 Errors in biogenesis result in defective ribosomal subunits that could interfere with translation.  
189 Recent work has shown that rRNA in defective ribosomal subunits is eliminated by degradation,  
190 which is initiated by RNase E cleavage (Zundel et al. 2009; Basturea et al. 2011; Sulthana et al.  
191 2016; Hamouche et al. 2021b). This work leads to the proposal that the membrane-attached RNA  
192 degradosome scans newly synthesized ribosomal subunits as part of a quality control mechanism  
193 in which correctly assembled particles are matured by RNase E trimming of the 17S and 9S rRNA  
194 precursors to 16S and 5S rRNA, respectively, whereas rRNA degradation in defective particles is  
195 initiated by RNase E cleavages within 16S and 23S rRNA. Here, we show that attachment of the  
196 RNA degradosome to the inner cytoplasmic membrane shields rRNA intermediates in ribosome  
197 assembly from wasteful degradation, which is initiated in the mutant *rne $\Delta$ MTS* strain by soluble  
198 ncRNase E. We propose that rRNA in defective, partially unfolded ribosomal subunits is degraded  
199 by imRNase E cleavage at sites that are normally sequestered in intact, properly folded ribosomes.

200

201

## 202 **Results**

203

### 204 **A genetic link between RNase E localization and ribosome biogenesis.**

205

206 We previously observed that the *rne* $\Delta$ MTS strain, which expresses ncRNase E, grows at about  
207 80% of the rate of the isogenic *rne*<sup>+</sup> strain expressing imRNase E (Hadjeras et al. 2019). To  
208 investigate the slow growth rate, we first analyzed cell shape and size. Visual inspection of the  
209 micrographs in **Fig. 1A** shows no obvious morphological difference between the *rne* $\Delta$ MTS and  
210 *rne*<sup>+</sup> strains. This result suggests that the slower growth rate is not due to defective cell wall  
211 synthesis or cell division since the morphology is normal. Next, we measured cell size. In LB  
212 medium, there is a small decrease in cell length and width in the mutant strain that results in about  
213 a 10% decrease in cells size (**Fig. 1B**). Similar results were obtained in MOPS-glycerol medium  
214 although the difference in cell width is negligible. From these results, we conclude that the slower  
215 rate of growth of the *rne* $\Delta$ MTS strain correlates with a small decrease in cell size, which is  
216 consistent with known correlations between growth rate and cell size in *E. coli* (Zheng et al. 2020).

217

218 During the preparation of RNA for transcriptome analyses (Hadjeras et al. 2019), we noticed an  
219 increased level of Low Molecular Weight (LMW) RNA in the *rne* $\Delta$ MTS strain (**Fig. S1**). When  
220 we extracted total RNA from exponentially growing strains in LB, we consistently obtained about  
221 50% more RNA from the *rne* $\Delta$ MTS strain (**Fig. 1C**). Since RNA was extracted from cultures  
222 grown to the same density (OD<sub>600</sub>=0.4) and there is only a small difference in cell size between the  
223 *rne* $\Delta$ MTS and *rne*<sup>+</sup> strains, these results show a significant increase in total RNA levels in the  
224 *rne* $\Delta$ MTS mutant strain. We fractionated total RNA on an agarose gel by loading RNA extracted  
225 from equal volumes of cultures grown to the same density (**Fig. 1D**). The levels of 23S and 16S  
226 rRNA are comparable whereas the level of LMW RNA is about 30% higher in the mutant strain.  
227 These results show that the 50% increase in total RNA is at least partly due to an increase in LMW  
228 RNA. Although we have previously reported a slowdown in mRNA degradation in the *rne* $\Delta$ MTS  
229 strain (Hadjeras et al. 2019), it seems unlikely that the accumulation of mRNA degradation  
230 intermediates could by themselves explain the large increase in LMW RNA.

231

232 Comparable levels of 23S and 16S rRNA in the *rne*<sup>+</sup> and *rne* $\Delta$ MTS strains strongly suggests that  
233 ribosome content in the mutant and wild type strains are comparable. Nevertheless, the slow  
234 growth phenotype could be due to a defect in translation resulting in lower protein synthesis rates.  
235 We therefore analyzed polyribosome profiles by velocity sedimentation on sucrose gradients to



236 compare the level of 70S ribosomes to polyribosomes. **Fig. 1E** shows that the ratio of 70S  
237 ribosomes to polysomes is comparable between the two strains thus arguing against a defect in  
238 translation. However, the appearance of aberrant particles in the mutant strain with sedimentation  
239 coefficients of approximately 20S and 40S is striking. This result suggests a defect in ribosome  
240 assembly in the *rne* $\Delta$ MTS strain that could explain the slow growth phenotype.

241

#### 242 **Characterization of the 20S and 40S particles.**

243

244 To characterize the RNA composition of the 20S and 40S particles in the *rne* $\Delta$ MTS strain, sucrose  
245 gradient sedimentation was optimized to resolve the 20S to 70S region. RNA extracted from each  
246 sucrose gradient fraction was analyzed by slot blots probed with oligonucleotides specific to 17S,  
247 p16S, 16S, p23S, 23S and 5S rRNAs (**Fig. 2A**). For comparison, we have included an analysis of  
248 sucrose gradient fractions from the wild type strain. For both strains, as expected, 70S ribosomes  
249 contain mature rRNAs (fractions 28/29), whereas the 30S subunit (fractions 18/19/20) contains  
250 17S, p16S and 16S rRNA and the 50S subunit (fractions 24/25/26) contains p23S, 23S and p5S  
251 rRNA. Analysis of polysome fractions by primer extension showed that they contain mature 5S,  
252 16S and 23S rRNA (**Fig. 2B**). Detection of 17S, p16S, p23S and p5S rRNA in the wild type strain  
253 shows that a proportion of the 30S and 50S subunits are newly synthesized particles containing  
254 rRNA precursors. This result is consistent with previous work showing that p<sub>2</sub>S30 and p<sub>3</sub>S50  
255 assembly intermediates, which contain precursor rRNA and a full complement of ribosomal  
256 proteins, co-sediment with mature 30S and 50S ribosomal subunits (Lindahl 1973; Shajani et al.  
257 2011). In the *rne* $\Delta$ MTS strain, the 20S particle contains the 17S and p16S precursors of 16S  
258 rRNA; the 40S particle contains the p23S and p5S precursors of 23S and 5S rRNA, respectively.  
259 The identification of rRNA precursors in the 20S and 40S particles was confirmed by primer  
260 extension (**Fig. S2**) and 5' RACE (**Fig. S3**).

261

#### 262 **Exonucleolytic degradation of rRNA by oligoadenylation and PNPase.**

263

264 The presence of p5S rRNA in the LMW (low molecular weight) region of the ribosome profile of  
265 the *rne* $\Delta$ MTS strain is striking (**Fig. S2**). In addition, p5S in LMW fractions co-sediments with L5  
266 and L18 (**Fig. 2A, Western blots**), which are r-proteins known to bind to 5S rRNA (Korepanov et  
267 al. 2012). The co-sedimentation of p5S with L5/L18 in the LMW fractions is specific to the  
268 *rne* $\Delta$ MTS strain since they are almost undetectable in the wild type *rne*<sup>+</sup> strain. As a control, the  
269 sedimentation of S3, a 30S ribosomal protein, shows no differences in the *rne*<sup>+</sup> and *rne* $\Delta$ MTS

270 strains, indicating that not all r-proteins are found in the LMW fractions. Taken together, these  
271 results suggest that a proportion of p5S rRNA that is complexed with the L5/L18 r-proteins fails to  
272 incorporate into mature 50S ribosomal subunit in the *rne* $\Delta$ MTS strain. Since p5S rRNA is the  
273 product of RNase E cleavage, these results also show that the defect in ribosome assembly is not  
274 due to a defect in RNase E processing of rRNA.

275  
276 Separation of total RNA on denaturing polyacrylamide gels, which resolve small RNA species in  
277 the range of 50 to 500 nt, revealed a variant of 5S rRNA in the *rne* $\Delta$ MTS strain that we named 5S\*  
278 (Fig. 3A, lane 2). Primer extension with an oligonucleotide specific to 5S rRNA detected the  
279 presence of mature 5S rRNA 5' ends as well as species with 5' end extension (Fig. 3B, lane 2). We  
280 have consistently seen two bands located between 5S and 5S\* rRNA corresponding to species with  
281 1 or 2 nt extensions, which agrees with work showing minor heterogeneity in the 5' end of mature  
282 5S rRNA (Feunteun et al. 1972; Jain 2020). We gel purified 5S rRNA from the *rne*<sup>+</sup> and *rne* $\Delta$ MTS  
283 strains and 5S\* rRNA from the *rne* $\Delta$ MTS strain and used RACE analysis to map the 5' and 3'  
284 ends of these molecules. A large proportion of the 5S rRNAs have a 5' end corresponding to the  
285 mature molecule (Fig. S4A). In contrast, most of the 5S\* rRNAs have a 5' AUU extension that  
286 corresponds to the p5S precursor, which is generated by RNase E cleavage of 9S rRNA. Analysis  
287 of 3' ends showed that nearly all 5S rRNA molecules have a mature 3' end whereas the 5S\*  
288 molecules have heterogeneous 3' ends (Fig. S4B). A large proportion of these molecules have the  
289 3' CAA extension that corresponds to the p5S precursor as well as untemplated oligo(A) additions  
290 ranging from 1 to 4 nt. Oligo(A) additions are not detected in the  *$\Delta$ pcnB* background, which lacks  
291 poly(A) polymerase activity (Fig. S4C). 3' end analysis of RNA extracted from sucrose gradient  
292 fractions showed that p5S as well as p23S rRNA are oligoadenylated in the 40S particles from the  
293 *rne* $\Delta$ MTS strain whereas these RNAs had mature 3' ends in 50S ribosomal subunits from the *rne*<sup>+</sup>  
294 strain (Fig. S5). Taken together, these results show that 5S\* rRNA is an oligoadenylated form of  
295 p5S rRNA.

296  
297 We analyzed the steady-state level of 5S\* rRNA in the absence of PNPase and poly(A)  
298 polymerase. We first compared the electrophoretic profiles of total RNA in the mutant strains  
299 lacking these enzymes (Fig. 3A) and determined the levels of 5S\* by primer extension (Fig. 3B).  
300 Isogenic *rne*<sup>+</sup> and *rne* $\Delta$ MTS strains were compared to reveal phenotypes specifically associated  
301 with the MTS deletion. In the *rne*<sup>+</sup> strain, there is some 5S rRNA migrating at the position of 5S\*.  
302 Levels expressed as the ratio of 5S\*/5S shows that deletion of the genes encoding  
303 poly(A)polymerase and PNPase results in a large increase in 5S\* rRNA levels. Deletion of the

304 gene encoding PNPase alone also results in an increase in 5S\* rRNA, whereas deletion of the gene  
305 encoding poly(A) polymerase has a negligible effect. These results show that the principal  
306 pathway for the degradation of 5S\* rRNA is PNPase-dependent and suggest that there is a  
307 secondary pathway, which is poly(A) polymerase-dependent. This conclusion is strongly  
308 supported by slower rates of degradation of 5S\* rRNA in the  $\Delta pnp$  and  $\Delta pnp \Delta pcnB$  strains after  
309 treatment with rifampicin (Fig. 3C).

310

### 311 **16S and 23S rRNA are fragmented by ncRNase E.**

312

313 Since previous work has shown that RNase E has an essential role in ribosome quality control  
314 (Sulthana et al. 2016), we asked if 16S and 23S rRNA is fragmented in the 20S and 40S particles,  
315 respectively. To identify internal RNase E cleavages in 16S and 23S rRNA, we used an *exo<sup>-</sup>* strain  
316 background to knock down 3' exonuclease activity and thereby increase the level of rRNA  
317 fragments. Although there are a large number of 3' exonucleases in *E. coli*, RNase R and PNPase  
318 have a major role in the degradation of rRNA. Since inactivation of both genes encoding these  
319 enzymes is lethal, the *exo<sup>-</sup>* background combines a knockout of the *rnr* gene with the *pnp-200*  
320 allele, which expresses partially a partially inactive variant of PNPase (Cheng and Deutscher  
321 2003). Fig. 4A shows sedimentation profiles of ribosomes from strains in which the  $\Delta rnr$  and *pnp-*  
322 *200* alleles were moved into the *rne<sup>+</sup>* and *rne $\Delta$ MTS* strains. Total RNA was extracted from each  
323 fraction of the gradient and then separated by gel electrophoresis. As expected for both strains,  
324 full-length 23S and 16S rRNAs are found in 70S ribosomes and are present in 50S and 30S  
325 subunits, respectively. In the *rne $\Delta$ MTS* strain, the 20S particle, which is essentially devoid of  
326 intact 16S rRNA, contains shorter RNA species that are about 1000 and 500 nt in length. The 40S  
327 particle contains 23S rRNA as well as shorter RNA species that are about 1700 and 1000 nt in  
328 length. In addition, fragments of about 500 nt are conspicuous in the LMW RNA fractions of the  
329 *rne $\Delta$ MTS* strain. Northern blots of RNA from the sucrose gradients were probed with  
330 oligonucleotides specific to the 5' end of 16S rRNA and the 3' end of 23S rRNA (Fig. 4B). These  
331 blots show that the 1000 nt RNA fragment in the 20S particles contains the 5' end of 16S rRNA  
332 and the 1700 nt RNA fragment in the 40S particle contains the 3' end of 23S rRNA. These results  
333 show that rRNA in the 20S and 40S particles is fragments due to endoribonuclease cleavages that  
334 are very likely due to ncRNase E.

335

### 336 ***In vitro* cleavage of ribosomal RNA by RNase E.**

337

338 We tested the activity of RNase E on ribosomes or rRNA *in vitro* (Fig. 4C). In a high ionic  
339 strength buffer, which is necessary for stability 70S ribosomes, rRNA is resistant to RNase E  
340 cleavage. The total RNA lanes at the right of the panel show that RNase E readily degrades  
341 protein-free rRNA in the high ionic strength buffer. Digestion, which results in a smear of  
342 fragments less than approximately 600 nt in length, shows that there are a large number of  
343 cleavage sites. The resistance of rRNA to RNase E cleavage in the high ionic strengths buffer  
344 show that the binding of r-proteins to rRNA and secondary and tertiary RNA interactions protect  
345 rRNA from RNase E cleavage. The cleavage of protein-free rRNA by RNase E is slower in the  
346 low ionic strength buffer due to the limiting amount of  $Mg^{++}$ , which is necessary for RNase E  
347 activity. In a low ionic strength buffer, rRNA in ribosomes is nicked by RNase E to give a series of  
348 fragments ranging from 500 to 2000 nt in length. From these results, we conclude that a subset of  
349 RNase E cleavage sites is accessible when the ribosome is partially unfolded in the low ionic  
350 strength buffer.

351

### 352 **Mapping RNase E cleavage sites in ribosomal RNA.**

353

354 Using cRACE (circular Rapid Amplification of cDNA Ends), we mapped 16S and 23S rRNA  
355 cleavage sites *in vivo* in the *rneΔMTS-exo<sup>-</sup>* strain and *in vitro* using purified RNase E and  
356 ribosomes. The strategy employed in this analysis is described in Fig. S6. Fig. Table S1, which is a  
357 tabulation of the cRACE results, shows that the 3' ends of *in vivo* fragments often contain  
358 noncoded oligo(A) additions. Fig. 5A and B are schematic diagrams indicating RNase E cleavage  
359 sites mapped by cRACE. The frequency (n) represents the number of times an end was sequenced.  
360 The color-coded key indicates cleavages that were mapped *in vivo*, *in vitro* or both *in vivo* and *in*  
361 *vitro*. Cleavages *in vivo* in the +22 to +32 of 16S rRNA results in a nested set of fragments with  
362 raggedy 3' ends that are likely due to partial degradation by residual 3' exonuclease activity in the  
363 *rneΔMTS-exo<sup>-</sup>* strain. In Fig. 5A, many of the internal cleavages in 16S rRNA were detected both  
364 *in vivo* and *in vitro*, which validates the *in vitro* cleavage of partially unfolded ribosomes by RNase  
365 E as a faithful representation of the cleavage of rRNA in the aberrant 20S and 40S particles. Fig.  
366 5C shows the consensus sequence of rRNA cleavage sites that were mapped *in vivo*. The sequence  
367 is similar to the genome wide consensus obtained from 22,000 RNase E sites in *Salmonella*  
368 mRNA including the highly conserved U at position +2. (Chao et al. 2017b). These results are  
369 strong circumstantial evidence that ncrNase is responsible for cleavages of rRNA in the aberrant  
370 20S and 40S particles.

371

372 **Proteomic analysis of the 20S and 40S ribosomal particles.**

373

374 We next analyzed protein content of the 20S and 40S particles from the *rne* $\Delta$ MTS strain. Proteins  
375 from sucrose fractions corresponding to these particles as well as to the 50S and 30S subunits of  
376 the *rne*<sup>+</sup> and *rne* $\Delta$ MTS strains were extracted, digested with trypsin and then subjected to  
377 chromatography-tandem mass spectrometry (nanoLC-MS/MS), leading to the identification and  
378 quantification of 1286 proteins (detailed list in Table S2). To evaluate changes in protein  
379 compositions, pairwise comparisons based on MS intensity values were performed for each  
380 quantified protein, firstly, between *rne*<sup>+</sup> and *rne* $\Delta$ MTS strains for 30S and 50S particles, secondly,  
381 between 20S and 30S particles as well as 40S and 50S particles in *rne* $\Delta$ MTS strain. Variant  
382 proteins were selected based on their significant protein abundance variations between the  
383 compared ribosomal particles (fold-change (FC) > 2 and < 0.5, and Student t test P < 0.05).  
384 Volcano plots in **Fig. 6A and B** show that composition of the 30S and 50S particles is globally the  
385 same in the two strains. The wild type 30S and 50S particles are enriched in integral and  
386 associated membrane proteins (pstG, secY, sdaC, bamD, murF, ubiG, proY, ccmE, gadC, mipA,  
387 ftsY and accY) (Karp et al. 2018; Keseler et al. 2021). Since the preparation of lysates for sucrose  
388 gradient analysis involves the use of sodium deoxycholate to solubilize membrane associated  
389 ribosomes, an interaction of imRNase E as part of detergent micelles containing other membrane  
390 proteins with the ribosomal subunits, could account for contamination with detergent solubilized  
391 membrane proteins. In the *rne* $\Delta$ MTS strain, 17 small subunit proteins and 21 large subunit proteins  
392 are significantly underrepresented in the 20S and 40S particles, respectively (**Fig. 6C and D**).

393

394 50S particles from the *rne* $\Delta$ MTS strain are enriched in ncRNase E, PNPase, RhlB and enolase,  
395 which are components of the RNA degradosome, as well as SrmB and RluB (**Fig. 6B**). SrmB is a  
396 DEAD-box RNA helicase that acts early in the assembly of the 50S subunit; RluB is a  
397 pseudouridine synthetase that acts late in the assembly of the 50S subunit (Karp et al. 2018;  
398 Keseler et al. 2021). Since it is likely that the gradient fractions analyzed here contain a mixture of  
399 particles (see Discussion), these results suggest that the 50S fraction from the *rne* $\Delta$ MTS contains a  
400 proportion of immature/defective particles whose degradation is being initiated by the associated  
401 ncRNA degradosome. 40S particles (**Fig. 6D**) are also enriched in SrmB and RluB as well as  
402 RNase R and RimM, which is a factor involved in the assembly of the 30S subunit (Karp et al.  
403 2018; Keseler et al. 2021). The enrichment of RimM suggests a noncanonical interaction with  
404 aberrant 40S particles. The 20S particle is enriched for RNase III, RNase PH and  
405 oligoribonuclease (**Fig. 6C, E**) as well as the protein chaperones GroE-GroES, which have been

406 shown to have a role in assembly of the 50S ribosomal subunit (El Hage et al. 2001). Oddly, in the  
407 *rne* $\Delta$ MTS strain, the 30S fraction is enriched in a subset of large subunit proteins (Fig. 6C). A  
408 possible explanation for this result is that the 30S fraction in the *rne* $\Delta$ MTS strain is contaminated  
409 by slower sedimenting intermediates in the degradation of aberrant 40S particles. Proteins  
410 involved in ribosome assembly including enzymes that modify rRNA, ribonucleases, DEAD-box  
411 RNA helicases, the GroEL protein chaperone and the ClpXP protease are associated with the 20S  
412 and 40S particles, and most of these factors are underrepresented in the 30S and 50S ribosomal  
413 subunits (Fig. 6E). The underrepresented r-proteins and the associated ribosome assembly factors  
414 are supporting evidence for the conclusion that the 20S and 40S particles are aberrant dead-end  
415 intermediates in ribosome assembly.  
416  
417

## 418 **Discussion**

419

420 Here we have shown that the *E. coli rneΔMTS* strain expressing ncRNase E has an abnormal  
421 ribosome profile with high levels of 20S and 40S particles. 5' and 3' end analysis showed that the  
422 particles contain precursors of 16S, 23S and 5S rRNA thus supporting the conclusion that they are  
423 intermediates in ribosome assembly as opposed to intermediates in the degradation of mature  
424 ribosomal particles. rRNA in the 20S and 40S particles is fragmented by ncRNase E cleavage  
425 within the 16S and 23S sequences. Mapping of ncRNase E cleavages in the 20S and 40S particles  
426 revealed sites whose sequences correspond to the consensus previously determined by genome-  
427 wide mapping of mRNA cleavages in *Salmonella* (Chao et al. 2017a). *In vitro* experiments with  
428 purified RNase E and ribosomes showed that properly folded ribosomes are resistant to RNase E  
429 cleavage whereas protein-free rRNA is readily degraded by RNase E. rRNA in ribosomes that are  
430 partially unfolded *in vitro* under low ionic strength conditions is cleaved by RNase E at sites that  
431 overlap *in vivo* cleavage sites. From these results we conclude that rRNA cleavage sites in intact,  
432 properly folded ribosomes are sequestered by rRNA folding and r-protein binding.

433

434 In the *rneΔMTS* strain, fragments of 16S and 23 S rRNA as well as p5S rRNA have 3'  
435 untemplated oligo(A) extensions. Oligoadenylated p5S rRNA migrates electrophoretically as a  
436 distinct species that we named 5S\*. *In vivo* results with mutant strains showed that 3'  
437 exonucleolytic degradation of 5S\* rRNA involves the activities of PNPase and poly(A)  
438 polymerase. Measurements of 5S\* degradation after rifampicin treatment showed an  
439 approximately 5-fold increase in half-life in a *pnp<sup>-</sup>pcnB<sup>-</sup>* strain relative to the isogenic *rneΔMTS*  
440 control. It is also noteworthy that the exonucleolytic degradation pathway for 5S\* rRNA is the  
441 same as previously described for several sRNA molecules (Andrade et al. 2012; Chen et al. 2021).  
442 Our velocity sedimentation results showed that in the Low Molecule Weight fraction at the top of  
443 the gradient, there are significant amounts of 5S rRNA precursors that co-sediment with proteins  
444 L5 and L18, which are known to bind to 5S rRNA (Korepanov et al. 2012). These results suggest  
445 that the p5S-L5-L18 complex accumulates as an intermediate in the *rneΔMTS* strain and that its  
446 failure to incorporate into the 50S ribosomal subunit triggers its degradation.

447

448 The 20S and 40S particles are, respectively, nominally equivalent to the p<sub>1</sub>30S intermediate, which  
449 sediments as a 21S particle, and the p<sub>2</sub>50S, which sediments as a 43S particle. Nevertheless, our  
450 proteomics analysis showing that 17 small subunit proteins and 21 large subunit proteins are  
451 underrepresented in the 20S and 40S particles, respectively, is inconsistent with their identification

452 as *bone fide* intermediates in ribosome assembly. Furthermore, it is unlikely that the particles in  
453 the 20S and 40S sucrose gradient fractions are homogeneous in composition. Recent analysis of  
454 sucrose gradient fractions in the trailing edge of the 30S peak in a wild type strain showed that  
455 they contain a heterogeneous mixture of intermediates in ribosome assembly (Sashital et al. 2014).  
456 Similar results with intermediates in assembly of the 50S particle has led to the conclusion that  
457 ribosome assembly involves cooperative rRNA folding blocks that correspond to structural  
458 domains in the mature 30S and 50S ribosomal subunits, and that there are multiple parallel  
459 pathways leading to mature 30S and 50S ribosomal subunits (Davis et al. 2016; Davis and  
460 Williamson 2017).

461  
462 Considering the large number of ncRNase E cleavages of rRNA that we have mapped in the  
463 *rne $\Delta$ MTS* strain, we suspect that there are multiple pathways for the interference of ncRNase E  
464 with ribosome assembly. Although RNase E cleavage sites are single-stranded, the enzyme has the  
465 capacity to bind to structured RNA (Tsai et al. 2012; Bandyra et al. 2018). We therefore propose  
466 that ncRNase E competes directly with co-transcriptional r-protein binding resulting in misfolded  
467 intermediates lacking r-proteins. These dead-end intermediates are then cleaved by ncRNase E,  
468 which initiates their degradation. Although co-transcriptional interference with r-protein binding  
469 might be expected to trigger rho-dependent transcription termination, the rRNA transcription  
470 elongation complex is insensitive to rho-mediated termination (Condon et al. 1995; Huang et al.  
471 2020). In our view, ncRNase E interference and rRNA cleavage are stochastic processes leading to  
472 a large number of different dead-end intermediates. The association of ribosome assembly factors  
473 with the 20S and 40S particles suggest that these factors are trying to ‘rescue’ dead-end  
474 intermediates. However, the degradation of rRNA in these particles suggests that the damage is  
475 mostly irreversible.

476  
477 Our results strongly suggest that quality control of ribosomes is mediated by imRNase E. **Fig. 7** is  
478 a cartoon depicting how the compartmentalization of the RNA degradosome to the inner  
479 cytoplasmic membrane protects partially unfolded intermediates in ribosome assembly from  
480 wasteful degradation. In this model, membrane attached RNA degradosomes are involved in the  
481 ‘trimming’ of 17S rRNA to p16S rRNA and 9S rRNA to p5S rRNA (Misra and Apirion 1979;  
482 Misra and Apirion 1980; Li et al. 1999). We propose that trimming of intermediates in ribosome  
483 assembly on the inner cytoplasmic membrane occurs after the subunits are properly folded and  
484 contain a full complement of r-proteins. This leads to the suggestion that the membrane attached  
485 RNA degradosome acts as a sensor that discriminates between properly folded, functional



486 ribosomes and partially unfolded, inactive ribosomes that are degraded by the membrane-attached  
487 RNA degradosome in a quality control pathway. However, we believe that the interference of  
488 ncRNase E with ribosome assembly is likely to be mostly co-transcriptionally in the nucleoid and  
489 that normal ribosome quality control starts after intermediates are released from the nucleoid.

490

491 Ribosome biogenesis is a major activity in growing cells. The time it takes for a cell to double is  
492 directly related to the time it takes to double ribosome content. Since rRNA synthesis is the  
493 limiting step in ribosome biogenesis (Paul et al. 2004), the wasteful degradation of rRNA likely  
494 explains the slower rate of growth of the *rne $\Delta$ MTS* strain compared to the *rne*<sup>+</sup> strain (Khemici et  
495 al. 2008; Hadjeras et al. 2019). Enzymes involved in rRNA and mRNA degradation are the same  
496 (Carpousis et al. 2009; Zundel et al. 2009; Basturea et al. 2011; Sulthana et al. 2016; Hamouche et  
497 al. 2021b; this work). Since recent work has shown the importance of competition between RNase  
498 E substrates in setting rates of mRNA degradation (Nouaille et al. 2017; Etienne et al. 2020),  
499 competition between rRNA and mRNA degradation could explain the global slowdown in mRNA  
500 degradation in the *rne( $\Delta$ MTS)* strain (Hadjeras et al. 2019). The work reported here shows that  
501 membrane attachment of RNase E as a component of the RNA degradosome is necessary to avoid  
502 a futile cycle of wasteful degradation of intermediates in ribosome assembly. Conservation of  
503 membrane-associated RNase E throughout the  $\beta$ - and  $\gamma$ -Proteobacteria is likely due to selective  
504 pressure to avoid interference with ribosome biogenesis.

505

506 RNase E homologues in the  $\alpha$ -Proteobacteria lack identifiable MTS sequences and recent work,  
507 principally in *Caulobacter crescentus*, has shown that these enzymes are not attached to the inner  
508 cytoplasmic membrane. The RNA degradosome of *Caulobacter crescentus* is localized to the  
509 interior of the cell in condensates known as BR-bodies (Bacterial Ribonucleoprotein-bodies) that  
510 have properties similar to eukaryotic stress granules and P-bodies (Al-Husini et al. 2018; Bayas et  
511 al. 2018). Assembly of BR-bodies is dynamic and requires RNA substrate as evidenced by  
512 rifampicin treatment. The endoribonuclease activity of RNase E is necessary for the disassembly  
513 of BR-bodies as evidenced by catalytically inactive variants of the enzyme. The intrinsically  
514 unstructured C-terminal region of RNase E, which is conserved in the  $\alpha$ -Proteobacteria, is  
515 necessary and sufficient for BR-body formation. Characterization of the RNA content of  
516 *Caulobacter* BR-bodies showed that they are enriched in mRNAs and that rRNA and tRNA are  
517 excluded (Al-Husini et al. 2020). It was thus proposed that the *Caulobacter* BR-body is a  
518 compartment nucleated by the RNA degradosome in which mRNA is degraded. Selective  
519 permeability of the BR-body results in the enrichment of mRNA and mRNA decay intermediates

520 thus increasing their concentration and driving degradation to nucleotides, which is important for  
521 maintaining nucleotide pools for transcription and DNA replication in growing cells. Importantly,  
522 BR-bodies form a compartment that is distinct from the nucleoid and cytoplasm. These results  
523 suggest that intermediates in ribosome assembly in *Caulobacter* are protected from nicking by  
524 *Caulobacter* RNase E due to the sequestration of the RNA degradosome into condensates that  
525 exclude ribosome precursors, ribosomes and polysomes.

526  
527 Transcription and mRNA degradation in *Escherichia coli* and *Caulobacter crescentus* are  
528 physically separated in membraneless compartments. We therefore propose that these bacteria,  
529 which are separated by billions of years of evolution, use different strategies to achieve similar  
530 outcomes. Short-lived RNA degradosome puncta on the inner cytoplasmic membrane of *E. coli* are  
531 centers of mRNA degradation. The membrane attached RNA degradosome is also involved in the  
532 processing of rRNA and quality control of ribosomes. The physical separation of the RNA  
533 degradosome on the inner membrane from early steps in ribosome biogenesis in the nucleoid is  
534 necessary to prevent degradation of intermediates in ribosome assembly. The  
535 compartmentalization of RNA degradosomes in *Caulobacter* BR-bodies has functions similar to  
536 the membrane attachment of *E. coli* RNase E. BR-bodies are condensates in which the RNA  
537 degradosome and ribosome-free mRNA are concentrated thus driving degradation to nucleotides.  
538 BR-bodies exclude rRNA, ribosomes and polysomes thus segregating ribosome assembly from  
539 mRNA degradation. Compartmentalization of the mRNA degrading machinery in *E. coli* and  
540 *Caulobacter* is a fascinating example of evolution in which different cellular organizations result  
541 in solutions to similar problems involving the accessibility of RNA substrates to the RNA  
542 degradosome and the concerted degradation of mRNA to nucleotides.

543

544

## 545 **Material and Methods**

546

### 547 **Bacterial strains and growth**

548 The bacterial strains and oligonucleotides used in this study are included in the supplemental  
549 tables. Bacteria were grown either in LB or MOPS media prepared as described (Miller 1972;  
550 Neidhardt et al. 1974) at 180 rotations per minute (rpm) with normal aeration or agar plates at 37  
551 °C. All mutant strains were constructed using the lambda-Red system as described in (Datsenko  
552 and Wanner 2000). After allele substitution into the chromosome using an antibiotic resistance  
553 cassette, the constructs were genetically purified by bacteriophage phage P1 transduction and the  
554 cassettes were removed using FLP recombinase resulting in an *frt* (FLP recognition target) scar All  
555 constructs were validated by sequencing PCR products amplified from chromosomal DNA.

556

### 557 **Cell dimension measurements**

558 Samples for microscopy were prepared as in (Hamouche et al. 2021b). Briefly, bacterial strains  
559 were grown to  $OD_{600}=0.5$  at 37 °C with shaking in LB or MOPS medium supplemented with 0.5%  
560 glycerol and amino acids. Microscopy images were acquired on a Nikon Eclipse TI-E/B wide field  
561 epifluorescence microscope using phase contrast objective and were analyzed using Image J  
562 V.1.38 software. Statistical analysis and graphs were generated using GraphPad Prism, version 7.

563

### 564 **Polysome fractionation analysis**

565

566 Polysomes fractionation analyses were performed as described (Charollais et al. 2003; Reyes-  
567 Lamothe et al. 2012; Qin and Fredrick 2013) with some modifications. Briefly, overnight cultures  
568 diluted in fresh LB medium were cultured at 37 °C to an  $OD_{600nm}$  of 0.4. To stop bacterial growth  
569 and avoid ribosomes/polysomes dissociation, 40  $OD_{600}$  equivalent units were harvested by fast-  
570 chilling by placing the cultures directly in a cold flask on an ice-water bath with shaking for 3 min.  
571 After centrifugation at 6000 g for 15 min at 4 °C (JA14 rotor-Beckman), the cell pellet is  
572 resuspended with cold lysis buffer (1mg/ml lysozyme, 10mM  $MgCl_2$ , 60mM KCl, 10mM Tris-  
573 HCl pH8). For complete lysis, cells were subjected to two freeze-thaw cycles. After the second  
574 freeze-thaw cycle, 0.3% of sodium deoxycholate anionic detergent (D6750\_SIGMA) was added to  
575 solubilize the membrane proteins and the lysate was clarified by centrifugation at 10000 g for  
576 10min at 4 °C. To analyze polysome profiles, a constant volume of extract was layered onto an  
577 ultracentrifuge tube (tube 13.2mL-Beckman Coulter SW-41) containing a continuous 10-40%  
578 (w/v) sucrose gradient prepared in the following buffer: (10 mM  $MgCl_2$ , 20mM Tris-HCl pH7.5,

579 100mM NH<sub>4</sub>Cl, 2mM dithiothreitol (DTT)) and centrifuged at 35000 rpm for 3h30 at 4 °C in an  
580 Optima XPN-80-Beckman Coulter ultracentrifuge. Sucrose gradients were analyzed on a density  
581 gradient fractionation system (ISCO UA-6 detector / Brandel Foxy Gradient) with continuous  
582 monitoring at 254nm, allowing the various ribosomal peaks to be resolved. To specifically analyze  
583 and resolve the ribosomal subunits, the extracts were layered onto a continuous 5-20% (w/v)  
584 sucrose gradient in the same buffer described above and centrifuged at 28600 rpm for 7h at 4 °C in  
585 a Beckman SW-41 rotor. The collected fractions were subjected to RNA and/or protein analyses.

586

### 587 **Total RNA extraction**

588

589 2 to 4 OD<sub>600</sub> of bacterial cell cultures were mixed with 0.2 volume of stop solution (ethanol:  
590 phenol 95:5 v/v) and snap-frozen in liquid nitrogen. Samples were thawed on ice, spun at 4000  
591 rpm for 15 minutes at 4 °C and the cell pellet was dissolved in 1 mL TRIzol<sup>R</sup> (Invitrogen,  
592 #15596026). An equal volume of ethanol was added to the mixture and total RNA was prepared  
593 using a Direct-zol<sup>TM</sup>, RNA MiniPrep Plus kit (Zymo Research) following the manufacturer's  
594 instructions and Dnase I digested using the Dnase provided in the same kit. RNA was eluted in  
595 80 µl milliQ water (RNase-free) and RNA amount and purity were determined using a  
596 NanoDrop<sup>TM</sup> spectrophotometer.

597

### 598 **RNA isolation after fractionation on sucrose gradients**

599

600 RNAs were extracted from sucrose gradient fractions by adding one volume of TRIzol<sup>R</sup> and by  
601 using, the Direct-zol<sup>TM</sup> RNA Miniprep Plus kits (ZYMO RESEARCH, #R2072). The RNAs were  
602 eluted in 60µl of milliQ water (RNase-free) and subjected to DNase I digestion. After purification,  
603 the same amounts of RNA, unless indicated elsewhere, were used to perform primer extension  
604 analyses on the rRNAs as described below. Moreover, the same volume of RNA from sucrose  
605 fractions was also separated on native agarose gels (1%) (that do not contain formaldehyde), in 1X  
606 TBE buffer (10X TBE: 890mM Tris base, 890mM Boric acid, 20mM EDTA) for 3h30 at 50V.  
607 After electrophoresis, the gels were either subjected to Northern blotting as described below or  
608 stained with SYBR<sup>TM</sup> Safe stain (Invitrogen).

609

### 610 **Primer extension analysis**

611 2 pmol of 5'end labelled primer (primers specific to 5S, 16S and 23S rRNA) and 0.25-1µg of  
612 RNA (total RNA or RNA extracted from sucrose gradient fractions) were denatured together in

613 water for 5 min at 65 °C, and immediately quenched on ice for 5 min. 50 0 $\mu$ M dNTPs, 1x first  
614 strand buffer, 5mM DTT, 1 U/ $\mu$ l RNase inhibitor (ThermoScientific) and 1 $\mu$ l Superscript III  
615 reverse transcriptase (200U, Invitrogen) were added to the denatured RNA and primer (20 $\mu$ l  
616 reaction). Primer extension was allowed for 50 min at 55 °C. After heat inactivation of the reverse  
617 transcriptase for 5 min at 85 °C, samples were treated with 2U RNase H (Thermo Scientific) at 37  
618 °C for 20 min. 2-5 $\mu$ l of the resulting reaction were mixed with an RNA loading dye and resolved  
619 on a 6% PAA, 7M urea sequencing gel along with the sequencing ladder. The sequencing ladder  
620 was obtained on a plasmid containing the 9S coding gene (*rrfB*) using USB® Sequenase™  
621 version 2.0 DNA polymerase (Affymetrix) following the supplier's instructions. cDNA signals  
622 were visualized on a phosphoimager (Typhoon Trio- Amersham-Bioscience) and band intensities  
623 were quantified using MultiGauge software (Fujifilm).

624

### 625 **Northern blotting**

626

627 5 to 10 $\mu$ g of DNase I-digested total RNA were denatured for 5 min at 95 °C in RNA loading dye  
628 (95% formamide, 0,1% xylene cyanol, 0,1% bromophenol blue, 10mM EDTA), chilled on ice for  
629 2 min, then separated either on 6% denaturing PAA gels (7M urea) or on 1% agarose gels (native  
630 conditions). The RNA was transferred to Hybond-XL membrane (GE Healthcare) by electro-  
631 blotting at 50V, for 1h using 1X TBE buffer (10X TBE: 890mM Tris base, 890mM Boric acid,  
632 20mM EDTA), then cross-linked to the membrane by UV crosslinking (120kJ). The membranes  
633 were pre-incubated for 1h with 15ml of Roti-Hybri-Quick buffer (Roth) at 42 °C and then the  
634 radiolabeled probes were added and incubated ON. The membranes were rinsed with 5X SSC  
635 (20X SSC: 3 M sodium chloride, 0.3 M sodium citrate, SSC buffer contains in addition 0.1% SDS)  
636 to remove the non-hybridized probe, then washed three times at 42 °C with SSC buffer (15 min  
637 with 5X SSC, 15 min with 1X SSC and 15 min with 0.1X SSC). RNA signals were visualized on a  
638 phosphoimager (Typhoon Trio- Amersham-Bioscience) and band intensities were quantified using  
639 MultiGauge software (Fujifilm).

640

### 641 **Slot blot**

642

643 The slot blots were generated as described in (Hadjeras et al. 2019). 20  $\mu$ l of cell extract from  
644 fractions collected after sucrose gradient fractionation were denatured in the presence of  
645 denaturing buffer (2.2 M formaldehyde, 50% formamide, 0.5 mM EDTA, 10 mM MOPS, 4 mM  
646 NaCl) and incubated at 65 °C for 5 minutes. Samples were directly placed in a slot on a nylon

647 membrane by vacuum filtration (Amersham Hybond-XL-GE Healthcare) using a transfer collector  
648 (PR648-Hoefer™ Slot Blot). The RNA present in the deposited extracts was irreversibly fixed to  
649 the membrane by ultraviolet treatment (120 kJ/cm<sup>2</sup>). The membranes were subsequently  
650 hybridized with radiolabeled oligonucleotide probes specific for the rRNAs as described above for  
651 Northern blot.

652

### 653 **5' RACE**

654

655 The 5' ends of rRNAs were mapped using 5' RACE (Rapid amplification of cDNA ends) analysis  
656 following the protocol described (Argaman et al. 2001). First, total RNA or purified rRNAs with  
657 5' monophosphate ends were ligated to the 3' hydroxyl group of an RNA oligonucleotide adapter,  
658 followed by reverse transcription with a gene-specific primer (RT primer) and subsequent PCR  
659 amplification using a 5'-adapter-specific primer and a gene-specific primer. Briefly, the RNA-  
660 adapter ligation was performed overnight at 17 °C in the presence of 0.5-1µg total RNA or  
661 purified 5S and 5S\* rRNA, 21pmol of RNA adapter (RNA A3), 10 units of T4 RNA ligase  
662 (ThermoScientific), 1X RNA ligase buffer containing ATP, 15% DMSO and 20 units of RNase  
663 Inhibitor in a 20µl final reaction. After addition of 2 pmol of a reverse transcription primer, the  
664 reaction was adjusted to a final volume of 150µl by adding milliQ water (RNase-free).

665 Subsequently, the adapter-ligated RNAs were extracted with 1 volume of phenol-chloroform-  
666 isoamyl alcohol (P: C: I) in PLG tubes. The aqueous phase was mixed with 3 volumes of a mixture  
667 of ethanol and sodium acetate at pH5, ratio 29: 1, to precipitate the RNAs. The adapter-ligated  
668 RNAs were dissolved in 30 µl of milliQ water (RNase-free). 0.25-0.5µg of the adapter-ligated  
669 RNAs were converted to cDNA using an RT primer specific for each gene encoding the rRNAs  
670 and the Superscript III reverse transcriptase as described above (primer extension). After treatment  
671 with 1 unit of RNase H (ThermoScientific), 2µl of the cDNA samples were used as template for a  
672 PCR reaction using 1 unit of PHUSION® DNA polymerase (Finnzymes), 1X GC buffer, 0.2mM  
673 dNTPs, 3% DMSO, and 1µM of the pair of oligonucleotides: the sense primer DNA b6, which  
674 anneals to the RNA-adapter sequence, and an antisense primer that anneals within the gene of  
675 interest (5S, 16S or 23S). Following visualization on 3% agarose gels, PCR products were excised,  
676 purified, and then sequenced after cloning using the Zero Blunt® TOPO® PCR cloning kit  
677 (Invitrogen).

678

### 679 **3' RACE**

680

681 0.5 to 1µg total or purified RNA were first dephosphorylated using 1U of thermosensitive Alkaline  
682 phosphatase FastAP (ThermoScientific) in the presence of 10X AP buffer and 20U of RNase  
683 inhibitor (ThermoScientific) in a final volume reaction of 20µl for 15 minutes at 37 °C.  
684 Dephosphorylated RNA was subjected to P:C:I extraction and precipitation with 3 volumes of 30:1  
685 ethanol/sodium acetate solution. The dephosphorylated RNA was ligated to an RNA adapter (RNA  
686 E1) ON at 17 °C, P:C:I extracted and precipitated as described above. 0.25 to 0.5µg of the ligated  
687 RNA was reverse transcribed in the presence of 5pmol of E4 DNA primer (complementary to the  
688 E1 RNA adapter) using 200U of Superscript III (Invitrogen) as described above. After treatment  
689 with 1U of RNase H (ThermoScientific), 2µl of the cDNA samples were used as template for a  
690 PCR reaction using: 1U of PHUSION® DNA polymerase (Finnzymes), 1X GC buffer, 0.2mM  
691 dNTPs, 3% DMSO, and 1µM of a pair of oligonucleotides: the sense primer that anneals within  
692 the gene of interest (5S, 16S or 23S), and the antisense primer E4 DNA. Following separation on  
693 3% agarose gels, PCR products were excised, purified, and sequenced after cloning using Zero  
694 Blunt® TOPO® PCR cloning kit (Invitrogen).

695

#### 696 **cRACE**

697

698 Purified rRNA fragments extracted from the agarose gel (Fig. S4) were circularized with 20 units  
699 T4 RNA ligase (ThermoScientific), 1X RNA ligase buffer containing ATP, 15% DMSO and 20  
700 units of RNase Inhibitor in a 20µl final reaction for 30min at 37 °C. After addition of 2 pmol of a  
701 reverse transcription primer, the reaction was adjusted to a final volume of 150µl by adding milliQ  
702 water (RNase-free). Subsequently, the circularized RNAs were extracted with 1 volume of phenol-  
703 chloroform-isoamyl alcohol (P: C: I) in PLG tubes. The aqueous phase was mixed with 3 volumes  
704 of a mixture of ethanol and sodium acetate at pH5, ratio 29: 1, to precipitate the RNAs. 0.25 µg of  
705 circularized RNAs were converted to cDNA using an RT primer specific for each gene encoding  
706 the rRNAs and the Superscript III reverse transcriptase as described above (primer extension). The  
707 reverse transcripts were PCR amplified using PHUSION® DNA polymerase (Finnzymes) and  
708 appropriate primers. The products were separated on a 3% agarose gel, purified, and then  
709 sequenced after cloning using the Zero Blunt® TOPO® PCR cloning kit (Invitrogen).

710

#### 711 **RNA stability experiments**

712

713 *Escherichia coli* strains were grown on LB at 37 °C to an OD<sub>600</sub> of 0.4 and then rifampicin was  
714 added to a final concentration of 500µg/ml to block new RNA synthesis. Incubation was continued

715 at 37 °C and aliquots were withdrawn at different time points (for example 0, 1, 2, 4, 8, 16, and 32  
716 minutes) after rifampicin addition, mixed with 0.2 volume of stop solution (5% phenol, 95%  
717 ethanol v/v), and directly snap frozen in liquid nitrogen. After thawing on ice and pelleting the  
718 cells, total RNA was extracted using TRIzol® reagent. RNA levels were measured for the  
719 different time points after rifampicin treatment, by primer extension; and the relative half-lives of  
720 the 5S\* RNAs were calculated. The quantities at different time points are plotted in a semi-  
721 logarithmic plot on Microsoft Excel, after normalization by defining the 0 time point (before  
722 rifampicin treatment) as having 100% RNA, using exponential fitting. The obtained decay curves  
723 appeared linear. The regressions curve function equation was used to determine the relative RNA  
724 half-lives.

725

### 726 **Purification of rRNA from polyacrylamide or agarose gels**

727

728 5 to 10 µg of DNaseI-digested total RNA resuspended with the RNA loading buffer (95%  
729 formamide, 0.1% xylene cyanol, 0.1% bromophenol blue, 10 mM EDTA), denatured for 5 minutes  
730 at 95 °C, were separated by electrophoresis on 10% polyacrylamide gel in denaturing condition (7  
731 M urea) in 1X TBE buffer (10X TBE: 890mM Tris base, 890mM boric acid, 20mM EDTA) for  
732 5h15 at 300V. To purify 16S and 23S degradation fragments, RNA from sucrose fractions were  
733 separated on a 1% agarose gel in 1X TBE buffer for 3h30 at 50V. After staining with SYBR™  
734 Safe stain (Invitrogen) and visualization on ChemiDoc imager (Biorad), the bands corresponding  
735 to 5S, 5S\* and the different degradation fragments of 16S and 23S were cut and extracted from the  
736 gel in 0.3ml RNA elution buffer (0.1 M sodium acetate pH 6.5, 0.1% SDS and 10 mM EDTA pH  
737 8) and incubated with agitation ON at 6-10 °C. After centrifugation at 14000rpm for 15 minutes at  
738 4 °C, RNA was purified using Bio-Spin P30 columns (Bio-Rad). The RNAs were precipitated with  
739 1 volume of absolute ethanol, eluted with 30µl of milliQ water (RNase-free) and then stored at -20  
740 °C.

741

### 742 **Preparation of proteins from sucrose gradient fractions**

743

744 Sucrose gradient fractions of 0.25 or 0.5 ml were collected, and proteins were precipitated by the  
745 addition of trichloroacetic acid (TCA\_SIGMA) to a final concentration of 18%. The samples were  
746 mixed by inversion and frozen at -20 °C for 30 minutes. The proteins were pelleted by  
747 centrifugation at 16000g for 30 minutes at 4 °C and the protein pellets were washed twice with  
748 0.3ml of cold acetone. Acetone was then removed by centrifugation at 16000g for 15 minutes at 4



749 °C. The proteins were resuspended in 20µl of 20mM Tris-HCl pH 7.5 and then denatured by  
750 addition of 2X Laemmli loading buffer (Laemmli 4X (Biorad): 277.8mM Tris-HCl pH6.8, 44.4%  
751 glycerol, 4.4% LDS, 0.02% Bromophenol blue) containing 5% β-mercaptoethanol followed by a  
752 heating step at 95 ° C for 5 minutes. 10 µl of proteins obtained after TCA precipitation were  
753 separated by 4-12% polyacrylamide gradient gel electrophoresis (NuPAGE-Invitrogen) in 1X  
754 MES buffer (50 mM MES, 50 mM Tris Base, 0.1% SDS 1 mM EDTA, pH 7.3) for 1h35 at 120V.  
755 After electrophoresis, the proteins were transferred to a nitrocellulose membrane (Biorad) using a  
756 TransBlot transfer device (Biorad) with the following parameters: mode: heterogeneous molecular  
757 weights, 25V, Time, 7 minutes and then subjected to western blotting.

758

### 759 **Western blotting**

760

761 The blots were treated with anti-L5, anti-S3, anti-L18 polyclonal antibodies provided by Isabelle  
762 Iost (INSERM, Bordeaux), hybridized with the second α-sheep-HRP antibody for 1 h at room  
763 temperature. Signals were visualized using the ECL kit (Biorad) on a ChemiDoc Imager (Biorad)  
764 for chemiluminescence detection.

765

### 766 **Determination of RNase E cleavage site *in vivo* and *in vitro***

767

768 To identify the cleavage sites of RNase E, sequences flanking the identified cleavages sites were  
769 aligned and analyzed by MEME suite (Version 4. 9. 1) to generate a consensus motif  
770 (<http://meme-suite.org/>) (Bailey et al. 2009) as described (Chao et al. 2017b).

771

### 772 **Ribosomal particles analysis by mass spectrometry**

773

774 For mass spectrometry analysis, proteins from the different ribosomal particles were prepared in  
775 triple biological replicates for each strain. Proteins were extracted from the ribosomal particles  
776 after separation on sucrose gradient by adding 18% of cold acetic acid. Protein pellets were  
777 resuspended in 25µl of cold 20 mM Tris-HCl, pH 7.5. Protein samples were reduced for 30 min  
778 with shaking at 56°C in 2X protein loading buffer (80 mM Tris-HCl pH 6.8, 4% SDS, 20%  
779 glycerol, 0.16% BBP, 49.2 mM DTT) and then alkylated in 66 mM iodoacetamide (SIGMA) for  
780 30 min in the dark at room temperature. Equal volumes of the obtained samples were loaded onto  
781 4-12% Bis-Tris Nu-PAGE gel (Thermofisher). For one-shot analysis of the entire mixture, no  
782 fractionation was performed, and the electrophoretic migration was stopped as soon as the protein

783 sample migrated for 0.5cm. The gel was briefly stained using then InstantBlue (Expedeon Protein  
784 Solutions) according to the manufacturer's instructions. Each single slice containing the whole  
785 sample was excised and subjected to in-gel tryptic digestion using modified porcine trypsin  
786 (Promega, France) at 10 ng/ $\mu$ l as previously described (Shevchenko A et al, 2001). The dried  
787 peptide extracts obtained were dissolved in 12  $\mu$ l of 0.05% trifluoroacetic acid in 2% acetonitrile  
788 and analyzed by online nanoLC using an Ultimate 3000 RSLCnano LC system (Thermo Scientific  
789 Dionex) coupled to an LTQ Orbitrap Velos mass spectrometer (Thermo Scientific, Bremen,  
790 Germany) for data-dependent CID fragmentation experiments. 5 $\mu$ l of each peptide extracts were  
791 loaded in two or three injection replicates onto 300 $\mu$ m ID x 5mm PepMap C18 precolumn  
792 (ThermoFisher, Dionex) at 20  $\mu$ l/min in 2% acetonitrile, 0.05% trifluoroacetic acid. After 5  
793 minutes of desalting, peptides were online separated on a 75  $\mu$ m ID x 50 cm C18 column (in-house  
794 packed with Reprosil C18-AQ Pur 3  $\mu$ m resin, Dr. Maisch; Proxeon Biosystems, Odense,  
795 Denmark), equilibrated in 95% of buffer A (0.2% formic acid), with a gradient of 5 to 25% of  
796 buffer B (80% acetonitrile, 0.2% formic acid) for 80min then 25% to 50% for 30 min at a flow rate  
797 of 300 nL/min. The LTQ Orbitrap Velos was operated in data-dependent acquisition mode with  
798 the XCalibur software (version 2.0 SR2, Thermo Fisher Scientific). The survey scan MS was  
799 performed in the Orbitrap on the 350–1,800 m/z mass range with the resolution set to a value of  
800 60,000. The 20 most intense ions per survey scan were selected with an isolation width of 2 m/z  
801 for subsequent data-dependent CID fragmentation and the resulting fragments were analyzed in  
802 the linear trap (LTQ). The normalized collision energy was set to 30%. To prevent repetitive  
803 selection of the same peptide, the dynamic exclusion duration was set to 60 s with a 10 ppm  
804 tolerance around the selected precursor and its isotopes. Monoisotopic precursor selection was  
805 turned on. For internal calibration the ion at 445.120025 m/z was used as lock mass.

806

### 807 **Database search and label-free quantitative analysis**

808

809 All raw MS files were processed with MaxQuant (v 1.6.1.0) for database search with the  
810 Andromeda search engine and for quantitative analysis. Data were searched against the  
811 UniProtKB/Swiss-Prot protein database released 2018\_04 with *Escherichia coli* (K12 strain)  
812 (5,979 sequences) supplemented with a list of frequently observed contaminant sequences  
813 provided in MaxQuant. Enzyme specificity was set to trypsin/P, and a maximum of two missed  
814 cleavages was allowed. Carbamidomethylation of cysteines was set as a fixed modification,  
815 whereas methionine oxidation was set as variable modification. The precursor mass tolerance was

816 set to 20 ppm for the first search and 10 ppm for the main Andromeda database search, and the  
817 mass tolerance in MS/MS mode was set to 0.8Da. The required minimum peptide length was  
818 seven amino acids, and the minimum number of unique peptides was set to one. Andromeda  
819 results were validated by the target-decoy approach using a reverse database and the false  
820 discovery rates at the peptide-spectrum matches (PSM) and protein level were set to 1%. For label-  
821 free relative quantification of the samples, the match between runs option of MaxQuant was  
822 enabled with a time window of 2 min, to allow cross-assignment of MS features detected in the  
823 different runs after alignment of the runs with a time window of 20 min. Protein quantification was  
824 based on razor peptides. The minimum ratio count was set to 1 for label-free quantification  
825 calculation, and computation of the intensity based absolute quantification (iBAQ) metric was also  
826 enabled.

827

828 To perform relative quantification between all identified proteins we used the normalized “LFQ  
829 intensity” metric from the MaxQuant “proteinGroups.txt” output. Protein groups with negative  
830 identification scores were filtered, as well as proteins identified as contaminants. After log<sub>2</sub>-  
831 transformation of LFQ intensities, log transformed protein intensities corresponding to different  
832 technical LC-MS replicate runs were averaged and missing values were replaced to a mean LFQ  
833 intensity value was computed from technical LC-MS replicate runs by a noise value randomly  
834 drawn using the Perseus software (version 1.5.3.0). For each pairwise comparison of protein  
835 content of the subparticles 20S and 40S with their parental 30S and 50S from *rne*ΔMTS and with  
836 the 30S and 50S from *rne*<sup>+</sup>, an unpaired two-tailed Student’s t-test was performed based on the  
837 protein intensities. Proteins were considered significantly enriched when their absolute log<sub>2</sub>-  
838 transformed fold change was higher than 1 and their p-value lower than 0.05. To eliminate false-  
839 positive hits from quantitation of low intensity signals, two additional criteria were applied: only  
840 the proteins identified with a total number of averaged peptide spectrum match (PSM) counts > 4  
841 and quantified in a minimum of two biological replicates, before missing value replacement, for at  
842 least one of the two compared conditions were selected. Volcano plots were drawn to visualize  
843 significant protein abundance variations between the compared ribosomal particles. They represent  
844 -log<sub>10</sub> (p-value) according to the log<sub>2</sub> ratio. The complete list of the identified and quantified  
845 proteins and analyzed according to this statistical procedure is described in Table S3.

846

847 ***In vitro* cleavage assay**

848

849 Expression and purification of RNase E(1-598) with a C-terminal HISx6 tag in BL21(DE3) was as  
850 described (Khemici et al. 2008). Briefly, cells were lysed and debris were removed by  
851 centrifugation at 10,000 g, 4° C for 1 h. The cleared lysate was applied to an NTA-Ni column and  
852 eluted with an imidazole gradient. Peak fractions were dialyzed overnight in storage buffer (10  
853 mM Tris HCl, pH 7.5 - 500 mM NaCl - 50% glycerol - 0.2% Genapol X-080 - 10 mM MgSO<sub>4</sub> - 1  
854 mM EDTA - 1 mM TCEP - 1x Protease Inhibitor), flash frozen in liquid N<sub>2</sub>. and stored at -80° C.  
855 Concentration was determined by UV absorbance at 280 nm using a molar extinction coefficient  
856 calculated from the amino acid composition of the protein. Ribosomes were purchased from NEB  
857 (P0763S). Ribosomal RNA was prepared by extraction of ribosomes using a Direct-zol™ RNA  
858 purification kit.

859  
860 The RNase E cleavage assay was performed in a total reaction volume of 25 µl in either high ionic  
861 strength buffer (70 mM Tris, pH7.5, 100 mM KCl, 25 mM MgCl<sub>2</sub>, 10 mM DTT, 2U RNase  
862 inhibitor) or low ionic strength buffer (70 mM Tris, pH7.5, 10 mM DTT, 2U RNase inhibitor).  
863 Ribosomes (0.22 µM), or a comparable amount of rRNA (16 µg) were incubated with 0.3 µM  
864 RNase E(1-598)-Hisx6 at 37° C for 0, 30 or 60 min at 37 °C. Reactions were quenched with 75 µl  
865 of cold 10 mM EDTA and held on ice. RNA was extracted using Direct-zol™ RNA purification  
866 kit, eluted in 60 µl water (RNase-free), lyophilized, and suspended in 10 µl of RNA loading dye  
867 (95% formamide, 0,1% xylene cyanol, 0,1% bromophenol blue, 10mM EDTA). The sample was  
868 incubated for 3 min at 95 °C and then separated on a 1% agarose gel in 1x TBE for 195 min at  
869 50V. The gel was stained with SYBR™ Green stain (Invitrogen).

870

871

872 **Acknowledgements**

873

874 This work was supported by grants from the French National Research Agency (ANR-13-BSV6-  
875 0005; ANR-16-CE12-0014-02). LH was awarded a predoctoral fellowship from the French  
876 Ministry of Education. The work was also supported in part by the French Ministry of Research  
877 with the Investissement d'Avenir Infrastructures Nationales en Biologie et Santé program (ProFI,  
878 Proteomics French Infrastructure project, ANR-10-INBS-08). We thank Isabelle Iost for  
879 antibodies against ribosomal proteins.

880

881 **Author contributions**

882

883 LH, MB and AJC initiated the project. LH, MB, LP, CF, OBS, LH, LG, MCB and AJC designed  
884 experiments and analyzed data. LH, MB, IC, LP, QMO, CF, LH and LG performed experimental  
885 work. LH and AJC wrote the manuscript with feedback from the other authors.

886

887 **Declaration of interest**

888

889 The authors declare that they have no conflict of interest.

890

891

## 892 **References**

893

- 894 Ait-Bara S, Carpousis AJ. 2015. RNA degradosomes in bacteria and chloroplasts: classification,  
895 distribution and evolution of RNase E homologs. *Mol Microbiol* **97**: 1021-1135.
- 896 Ait-Bara S, Carpousis AJ, Quentin Y. 2015. RNase E in the gamma-Proteobacteria: conservation of  
897 intrinsically disordered noncatalytic region and molecular evolution of microdomains.  
898 *Molecular genetics and genomics : MGG* **290**: 847-862.
- 899 Al-Husini N, Tomares DT, Bitar O, Childers WS, Schrader JM. 2018. alpha-Proteobacterial RNA  
900 Degradosomes Assemble Liquid-Liquid Phase-Separated RNP Bodies. *Molecular cell* **71**: 1027-  
901 1039 e1014.
- 902 Al-Husini N, Tomares DT, Pfaffenberger ZJ, Muthunayake NS, Samad MA, Zuo T, Bitar O, Aretakis JR,  
903 Bharmal MM, Gega A et al. 2020. BR-Bodies Provide Selectively Permeable Condensates that  
904 Stimulate mRNA Decay and Prevent Release of Decay Intermediates. *Molecular cell* **78**: 670-  
905 682 e678.
- 906 Andrade JM, Pobre V, Matos AM, Arraiano CM. 2012. The crucial role of PNPase in the degradation of  
907 small RNAs that are not associated with Hfq. *RNA* **18**: 844-855.
- 908 Argaman L, Hershberg R, Vogel J, Bejerano G, Wagner EG, Margalit H, Altuvia S. 2001. Novel small  
909 RNA-encoding genes in the intergenic regions of Escherichia coli. *Current biology : CB* **11**: 941-  
910 950.
- 911 Bailey TL, Boden M, Buske FA, Frith M, Grant CE, Clementi L, Ren J, Li WW, Noble WS. 2009. MEME  
912 SUITE: tools for motif discovery and searching. *Nucleic Acids Res* **37**: W202-208.
- 913 Bandyra KJ, Wandzik JM, Luisi BF. 2018. Substrate Recognition and Autoinhibition in the Central  
914 Ribonuclease RNase E. *Molecular cell* **72**: 275-285 e274.
- 915 Basturea GN, Zundel MA, Deutscher MP. 2011. Degradation of ribosomal RNA during starvation:  
916 comparison to quality control during steady-state growth and a role for RNase PH. *RNA* **17**:  
917 338-345.
- 918 Bayas CA, Wang J, Lee MK, Schrader JM, Shapiro L, Moerner WE. 2018. Spatial organization and  
919 dynamics of RNase E and ribosomes in Caulobacter crescentus. *Proc Natl Acad Sci U S A* **115**:  
920 E3712-E3721.
- 921 Bohne AV. 2014. The nucleoid as a site of rRNA processing and ribosome assembly. *Front Plant Sci* **5**:  
922 257.
- 923 Callaghan AJ, Aurikko JP, Ilag LL, Gunter Grossmann J, Chandran V, Kuhnel K, Poljak L, Carpousis AJ,  
924 Robinson CV, Symmons MF et al. 2004. Studies of the RNA degradosome-organizing domain of  
925 the Escherichia coli ribonuclease RNase E. *J Mol Biol* **340**: 965-979.
- 926 Callaghan AJ, Marcaida MJ, Stead JA, McDowall KJ, Scott WG, Luisi BF. 2005. Structure of Escherichia  
927 coli RNase E catalytic domain and implications for RNA turnover. *Nature* **437**: 1187-1191.
- 928 Carpousis AJ. 2007. The RNA degradosome of Escherichia coli: an mRNA-degrading machine  
929 assembled on RNase E. *Annu Rev Microbiol* **61**: 71-87.
- 930 Carpousis AJ, Luisi BF, McDowall KJ. 2009. Endonucleolytic initiation of mRNA decay in Escherichia  
931 coli. *Progress in molecular biology and translational science* **85**: 91-135.
- 932 Carpousis AJ, Van Houwe G, Ehretsmann C, Krisch HM. 1994. Copurification of E. coli RNAase E and  
933 PNPase: evidence for a specific association between two enzymes important in RNA  
934 processing and degradation. *Cell* **76**: 889-900.
- 935 Chao Y, Li L, Girodat D, Forstner KU, Said N, Corcoran C, Smiga M, Papenfort K, Reinhardt R, Wieden  
936 HJ et al. 2017a. In Vivo Cleavage Map Illuminates the Central Role of RNase E in Coding and  
937 Non-coding RNA Pathways. *Molecular cell* **65**: 39-51.
- 938 Chao YJ, Li L, Girodat D, Forstner KU, Said N, Corcoran C, Smiga M, Papenfort K, Reinhardt R, Wieden  
939 HJ et al. 2017b. In Vivo Cleavage Map Illuminates the Central Role of RNase E in Coding and  
940 Non-coding RNA Pathways. *Molecular cell* **65**: 39-51.
- 941 Charollais J, Pflieger D, Vinh J, Dreyfus M, Iost I. 2003. The DEAD-box RNA helicase SrmB is involved in  
942 the assembly of 50S ribosomal subunits in Escherichia coli. *Mol Microbiol* **48**: 1253-1265.
- 943 Chen J, To L, de Mets F, Luo X, Majdalani N, Tai CH, Gottesman S. 2021. A fluorescence-based genetic  
944 screen reveals diverse mechanisms silencing small RNA signaling in E. coli. *Proc Natl Acad Sci*  
945 *U S A* **118**.

- 946 Cheng ZF, Deutscher MP. 2003. Quality control of ribosomal RNA mediated by polynucleotide  
947 phosphorylase and RNase R. *Proc Natl Acad Sci U S A* **100**: 6388-6393.
- 948 Condon C, Squires C, Squires CL. 1995. Control of rRNA transcription in *Escherichia coli*. *Microbiol Rev*  
949 **59**: 623-645.
- 950 Datsenko KA, Wanner BL. 2000. One-step inactivation of chromosomal genes in *Escherichia coli* K-12  
951 using PCR products. *Proc Natl Acad Sci U S A* **97**: 6640-6645.
- 952 Davis JH, Tan YZ, Carragher B, Potter CS, Lyumkis D, Williamson JR. 2016. Modular Assembly of the  
953 Bacterial Large Ribosomal Subunit. *Cell* **167**: 1610-1622 e1615.
- 954 Davis JH, Williamson JR. 2017. Structure and dynamics of bacterial ribosome biogenesis. *Philos Trans*  
955 *R Soc Lond B Biol Sci* **372**.
- 956 Deutscher MP. 2009. Maturation and degradation of ribosomal RNA in bacteria. *Progress in molecular*  
957 *biology and translational science* **85**: 369-391.
- 958 El Hage A, Sbaili M, Alix JH. 2001. The chaperonin GroEL and other heat-shock proteins, besides DnaK,  
959 participate in ribosome biogenesis in *Escherichia coli*. *Mol Gen Genet* **264**: 796-808.
- 960 Etienne TA, Coccagn-Bousquet M, Ropers D. 2020. Competitive effects in bacterial mRNA decay. *J*  
961 *Theor Biol* **504**: 110333.
- 962 Feunteun J, Jordan BR, Monier R. 1972. Study of the maturation of 5 s RNA precursors in *Escherichia*  
963 *coli*. *J Mol Biol* **70**: 465-474.
- 964 Gaal T, Bratton BP, Sanchez-Vazquez P, Sliwicki A, Sliwicki K, Vegel A, Pannu R, Gourse RL. 2016.  
965 Colocalization of distant chromosomal loci in space in *E. coli*: a bacterial nucleolus. *Genes Dev*  
966 **30**: 2272-2285.
- 967 Hadjeras L, Poljak L, Bouvier M, Morin-Ogier Q, Canal I, Coccagn-Bousquet M, Girbal L, Carpousis AJ.  
968 2019. Detachment of the RNA degradosome from the inner membrane of *Escherichia coli*  
969 results in a global slowdown of mRNA degradation, proteolysis of RNase E and increased  
970 turnover of ribosome-free transcripts. *Mol Microbiol* **111**: 1715-1731.
- 971 Hamouche L, Poljak L, Carpousis AJ. 2021a. Polyribosome-Dependent Clustering of Membrane-  
972 Anchored RNA Degradosomes To Form Sites of mRNA Degradation in *Escherichia coli*. *mBio*:  
973 e0193221.
- 974 -. 2021b. Ribosomal RNA degradation induced by the bacterial RNA polymerase inhibitor rifampicin.  
975 *RNA*.
- 976 Huang YH, Hilal T, Loll B, Burger J, Mielke T, Bottcher C, Said N, Wahl MC. 2020. Structure-Based  
977 Mechanisms of a Molecular RNA Polymerase/Chaperone Machine Required for Ribosome  
978 Biosynthesis. *Molecular cell* **79**: 1024-1036 e1025.
- 979 Jain C. 2020. RNase AM, a 5' to 3' exonuclease, matures the 5' end of all three ribosomal RNAs in *E.*  
980 *coli*. *Nucleic Acids Res* **48**: 5616-5623.
- 981 Jensen KF. 1993. The *Escherichia coli* K-12 "wild types" W3110 and MG1655 have an rph frameshift  
982 mutation that leads to pyrimidine starvation due to low pyrE expression levels. *J Bacteriol* **175**:  
983 3401-3407.
- 984 Kaberdina AC, Szaflarski W, Nierhaus KH, Moll I. 2009. An unexpected type of ribosomes induced by  
985 kasugamycin: a look into ancestral times of protein synthesis? *Molecular cell* **33**: 227-236.
- 986 Karp PD, Ong WK, Paley S, Billington R, Caspi R, Fulcher C, Kothari A, Krummenacker M, Latendresse  
987 M, Midford PE et al. 2018. The EcoCyc Database. *EcoSal Plus* **8**.
- 988 Keseler IM, Gama-Castro S, Mackie A, Billington R, Bonavides-Martinez C, Caspi R, Kothari A,  
989 Krummenacker M, Midford PE, Muniz-Rascado L et al. 2021. The EcoCyc Database in 2021.  
990 *Front Microbiol* **12**: 711077.
- 991 Khemici V, Poljak L, Luisi BF, Carpousis AJ. 2008. The RNase E of *Escherichia coli* is a membrane-  
992 binding protein. *Mol Microbiol* **70**: 799-813.
- 993 Korepanov AP, Korobeinikova AV, Shestakov SA, Garber MB, Gongadze GM. 2012. Protein L5 is crucial  
994 for in vivo assembly of the bacterial 50S ribosomal subunit central protuberance. *Nucleic Acids*  
995 *Res* **40**: 9153-9159.
- 996 Leroy A, Vanzo NF, Sousa S, Dreyfus M, Carpousis AJ. 2002. Function in *Escherichia coli* of the non-  
997 catalytic part of RNase E: role in the degradation of ribosome-free mRNA. *Mol Microbiol* **45**:  
998 1231-1243.
- 999 Li Z, Pandit S, Deutscher MP. 1999. RNase G (CafA protein) and RNase E are both required for the 5'  
1000 maturation of 16S ribosomal RNA. *Embo J* **18**: 2878-2885.
- 1001 Lindahl L. 1973. Two new ribosomal precursor particles in *E. coli*. *Nat New Biol* **243**: 170-172.

- 1002 Lopez PJ, Marchand I, Joyce SA, Dreyfus M. 1999. The C-terminal half of RNase E, which organizes the  
1003 *Escherichia coli* degradosome, participates in mRNA degradation but not rRNA processing *in*  
1004 *vivo*. *Mol Microbiol* **33**: 188-199.
- 1005 Malagon F. 2013. RNase III is required for localization to the nucleoid of the 5' pre-rRNA leader and for  
1006 optimal induction of rRNA synthesis in *E. coli*. *RNA* **19**: 1200-1207.
- 1007 Marcaida MJ, DePristo MA, Chandran V, Carpousis AJ, Luisi BF. 2006. The RNA degradosome: life in  
1008 the fast lane of adaptive molecular evolution. *Trends Biochem Sci* **31**: 359-365.
- 1009 McQuail J, Carpousis AJ, Wigneshweraraj S. 2021. The association between Hfq and RNase E in long-  
1010 term nitrogen-starved *Escherichia coli*. *Mol Microbiol*.
- 1011 Miczak A, Kaberdin VR, Wei CL, Lin-Chao S. 1996. Proteins associated with RNase E in a  
1012 multicomponent ribonucleolytic complex. *Proc Natl Acad Sci U S A* **93**: 3865-3869.
- 1013 Miller JH. 1972. *Experiments In Molecular Genetics*. Cold Spring Harbor Laboratory, Cold Spring  
1014 Harbor, New York.
- 1015 Miller OL, Jr., Hamkalo BA, Thomas CA, Jr. 1970. Visualization of bacterial genes in action. *Science*  
1016 **169**: 392-395.
- 1017 Misra TK, Apirion D. 1979. RNase E, an RNA processing enzyme from *Escherichia coli*. *J Biol Chem*  
1018 **254**: 11154-11159.
- 1019 -. 1980. Gene *rne* affects the structure of the ribonucleic acid-processing enzyme ribonuclease E of  
1020 *Escherichia coli*. *J Bacteriol* **142**: 359-361.
- 1021 Moffitt JR, Pandey S, Boettiger AN, Wang S, Zhuang X. 2016. Spatial organization shapes the turnover  
1022 of a bacterial transcriptome. *Elife* **5**.
- 1023 Muller C, Sokol L, Vesper O, Sauert M, Moll I. 2016. Insights into the Stress Response Triggered by  
1024 Kasugamycin in *Escherichia coli*. *Antibiotics (Basel)* **5**.
- 1025 Murashko ON, Lin-Chao S. 2017. *Escherichia coli* responds to environmental changes using enolase  
1026 degradosomes and stabilized DicF sRNA to alter cellular morphology. *Proc Natl Acad Sci U S A*  
1027 **114**: E8025-E8034.
- 1028 Neidhardt FC, Bloch PL, Smith DF. 1974. Culture medium for enterobacteria. *J Bacteriol* **119**: 736-  
1029 747.
- 1030 Nouaille S, Mondeil S, Finoux AL, Moulis C, Girbal L, Coccagn-Bousquet M. 2017. The stability of an  
1031 mRNA is influenced by its concentration: a potential physical mechanism to regulate gene  
1032 expression. *Nucleic Acids Res* **45**: 11711-11724.
- 1033 Ow MC, Liu Q, Kushner SR. 2000. Analysis of mRNA decay and rRNA processing in *Escherichia coli* in  
1034 the absence of RNase E-based degradosome assembly. *Mol Microbiol* **38**: 854-866.
- 1035 Papanastasiou M, Orfanoudaki G, Koukaki M, Kountourakis N, Sardis MF, Aivaliotis M, Karamanou S,  
1036 Economou A. 2013. The *Escherichia coli* peripheral inner membrane proteome. *Mol Cell*  
1037 *Proteomics* **12**: 599-610.
- 1038 Papanastasiou M, Orfanoudaki G, Kountourakis N, Koukaki M, Sardis MF, Aivaliotis M, Tsolis KC,  
1039 Karamanou S, Economou A. 2016. Rapid label-free quantitative analysis of the *E. coli*  
1040 BL21(DE3) inner membrane proteome. *Proteomics* **16**: 85-97.
- 1041 Paul BJ, Ross W, Gaal T, Gourse RL. 2004. rRNA transcription in *Escherichia coli*. *Annu Rev Genet* **38**:  
1042 749-770.
- 1043 Py B, Higgins CF, Krisch HM, Carpousis AJ. 1996. A DEAD-box RNA helicase in the *Escherichia coli* RNA  
1044 degradosome. *Nature* **381**: 169-172.
- 1045 Qin D, Fredrick K. 2013. Analysis of polysomes from bacteria. *Methods in enzymology* **530**: 159-172.
- 1046 Reyes-Lamothe R, Nicolas E, Sherratt DJ. 2012. Chromosome replication and segregation in bacteria.  
1047 *Annu Rev Genet* **46**: 121-143.
- 1048 Sashital DG, Greeman CA, Lyumkis D, Potter CS, Carragher B, Williamson JR. 2014. A combined  
1049 quantitative mass spectrometry and electron microscopy analysis of ribosomal 30S subunit  
1050 assembly in *E. coli*. *Elife* **3**.
- 1051 Shajani Z, Sykes MT, Williamson JR. 2011. Assembly of bacterial ribosomes. *Annu Rev Biochem* **80**:  
1052 501-526.
- 1053 Soupene E, van Heeswijk WC, Plumbridge J, Stewart V, Bertenthal D, Lee H, Prasad G, Paliy O,  
1054 Charernnoppakul P, Kustu S. 2003. Physiological studies of *Escherichia coli* strain MG1655:  
1055 growth defects and apparent cross-regulation of gene expression. *J Bacteriol* **185**: 5611-5626.



- 1056 Strahl H, Turlan C, Khalid S, Bond PJ, Kebalo JM, Peyron P, Poljak L, Bouvier M, Hamoen L, Luisi BF et  
1057 al. 2015. Membrane recognition and dynamics of the RNA degradosome. *PLoS genetics* **11**:  
1058 e1004961.
- 1059 Studier FW, Moffatt BA. 1986. Use of bacteriophage T7 RNA polymerase to direct selective high-level  
1060 expression of cloned genes. *J Mol Biol* **189**: 113-130.
- 1061 Sulthana S, Basturea GN, Deutscher MP. 2016. Elucidation of pathways of ribosomal RNA  
1062 degradation: an essential role for RNase E. *RNA* **22**: 1163-1171.
- 1063 Sulthana S, Deutscher MP. 2013. Multiple exoribonucleases catalyze maturation of the 3' terminus of  
1064 16S ribosomal RNA (rRNA). *J Biol Chem* **288**: 12574-12579.
- 1065 Tsai YC, Du D, Dominguez-Malfavon L, Dimastrogiovanni D, Cross J, Callaghan AJ, Garcia-Mena J, Luisi  
1066 BF. 2012. Recognition of the 70S ribosome and polysome by the RNA degradosome in  
1067 *Escherichia coli*. *Nucleic Acids Res* **40**: 10417-10431.
- 1068 Vanzo NF, Li YS, Py B, Blum E, Higgins CF, Raynal LC, Krisch HM, Carpousis AJ. 1998. Ribonuclease E  
1069 organizes the protein interactions in the *Escherichia coli* RNA degradosome. *Genes Dev* **12**:  
1070 2770-2781.
- 1071 Zheng H, Bai Y, Jiang M, Tokuyasu TA, Huang X, Zhong F, Wu Y, Fu X, Kleckner N, Hwa T et al. 2020.  
1072 General quantitative relations linking cell growth and the cell cycle in *Escherichia coli*. *Nat*  
1073 *Microbiol* **5**: 995-1001.
- 1074 Zundel MA, Basturea GN, Deutscher MP. 2009. Initiation of ribosome degradation during starvation in  
1075 *Escherichia coli*. *RNA* **15**: 977-983.
- 1076
- 1077

1078 **Table 1. Strains and plasmid.**

1079

| <b>Strain</b>  | <b>Genotype</b>                                                                                                                                                  | <b>Reference</b>           |
|----------------|------------------------------------------------------------------------------------------------------------------------------------------------------------------|----------------------------|
| NCM3416        | <i>E. coli</i> K12, F <sup>-</sup> , λ <sup>-</sup> , <i>rph</i> <sup>+</sup> , <i>zib-207::Tn10</i>                                                             | (Soupene et al. 2003)      |
| MG1655         | F <sup>-</sup> , λ <sup>-</sup> , <i>rph</i> <sup>-</sup>                                                                                                        | (Jensen 1993)              |
| MBS106         | NCM3416, <i>rne</i> - <i>frt</i>                                                                                                                                 | (Hadjeras et al. 2019)     |
| MBS157         | NCM3416, <i>rne</i> Δ <i>MTS</i> - <i>frt</i>                                                                                                                    | (Hadjeras et al. 2019)     |
| BL21(DE3)      | F <sup>-</sup> , <i>ompT</i> , <i>hsdS<sub>B</sub></i> ( <i>r<sub>B</sub><sup>-</sup></i> , <i>m<sub>B</sub><sup>-</sup></i> ), <i>dcm</i> , <i>gal</i> , λ(DE3) | (Studier and Moffatt 1986) |
| Kti658         | MG1655, <i>rne</i> Δ <i>MTS</i> - <i>frt</i>                                                                                                                     | (Hadjeras et al. 2019)     |
| Kti665         | NCM3416 <i>rne</i> <sup>+</sup> Δ <i>pcnB</i>                                                                                                                    | This work.                 |
| Kti669         | NCM3416 <i>rne</i> Δ <i>MTS</i> Δ <i>pcnB</i>                                                                                                                    | This work.                 |
| LHS-457        | NCM3416 <i>rne</i> <sup>+</sup> Δ <i>pcnB</i> Δ <i>pnp</i>                                                                                                       | This work.                 |
| LHS-459        | NCM3416 <i>rne</i> Δ <i>MTS</i> Δ <i>pcnB</i> Δ <i>pnp</i>                                                                                                       | This work.                 |
| SQM-5          | NCM3416 <i>rne</i> <sup>+</sup> Δ <i>pnp</i>                                                                                                                     | This work.                 |
| SQM-6          | NCM3416 <i>rne</i> Δ <i>MTS</i> Δ <i>pnp</i>                                                                                                                     | This work.                 |
| SLP-35         | NCM3416 <i>rne</i> <sup>+</sup> Δ <i>rnr</i>                                                                                                                     | This work.                 |
| SLP-36         | NCM3416 (Huang et al. 2020) <i>rne</i> Δ <i>MTS</i> Δ <i>rnr</i>                                                                                                 | This work.                 |
| CA244          | <i>rnr</i> <sup>-</sup> <i>pnp-200</i> <i>Cm</i> <sup>r</sup>                                                                                                    | (Cheng and Deutscher 2003) |
| SLP-79         | NCM3416 <i>rne</i> <sup>+</sup> Δ <i>rnr</i> <i>pnp200-kn</i>                                                                                                    | This work.                 |
| SLP-80         | NCM3416 <i>rne</i> Δ <i>MTS</i> Δ <i>rnr</i> <i>pnp200-kn</i>                                                                                                    | This work.                 |
| Kti162         | NCM3416, <i>rne</i> - <i>mcherry</i>                                                                                                                             | (Strahl et al. 2015)       |
| Kti513         | NCM3416, <i>rne</i> Δ <i>MTS</i> - <i>mcherry</i>                                                                                                                | (Strahl et al. 2015)       |
| <b>Plasmid</b> | <b>Feature</b>                                                                                                                                                   | <b>Reference</b>           |
| pLP56-2        | pET- <i>rne</i> (1-598)-his6                                                                                                                                     | (Hadjeras et al. 2019)     |

1080

1081

1082 **Table 2. Primers.**

| <b>Name</b>    | <b>Sequence (5' to 3')</b>                      | <b>Use</b>                                                                    |
|----------------|-------------------------------------------------|-------------------------------------------------------------------------------|
| <b>LHO-183</b> | CGTATCTTCGAGTGCCCACA                            | Probe for 17S in slot blotting analysis (Charollais et al. 2003)              |
| <b>LHO-184</b> | GTGTTCACTCTTGAGACTTGG                           | Probe for p16S in slot blotting analysis                                      |
| <b>LHO-187</b> | CGCTTAACCTCACAAC                                | Probe for p23S in slot blotting analysis (Charollais et al. 2003)             |
| <b>MBO-059</b> | ACTACCATCGGCGCTACGGC                            | Probe for 5S in Slot blotting analysis                                        |
| <b>OLP118</b>  | TCCTCCCCGCTGAAAGTACT                            | Probe for 16S (431-450) in northern & slot blotting analysis                  |
| <b>OLP125</b>  | GACTGGCGTCCACACTTCAA                            | Probe for 23S (2131-2150) in northern & slot blotting analysis                |
| <b>RNA A3</b>  | AUAUGCGCGAAUCCUGUAG<br>AACGAACACUAGAAGAAAG      | RNA adapter for 5' RACE analysis                                              |
| <b>DNA B6</b>  | GCGCGAATTCCTGTAGA                               | Primer sense to RNA A3 adapter for 5' RACE analysis                           |
| <b>DNA E4</b>  | GGCCGCTAAGAACAGTGAA                             | Primer antisense to E1 RNA adapter for 3' RACE analysis (Argaman et al. 2001) |
| <b>RNA E1</b>  | (5'-P) UUCACUGUUCUUAGC<br>GGCCGCAUGCUC (idT-3') | RNA adapter for 3' RACE analysis                                              |
| <b>MBO-163</b> | CGGCGTTTCACTTCTGAGTTC<br>GGC                    | 5S rRNA primer extension and 5' RACE                                          |
| <b>LHO-117</b> | CCTTCATCGCCTCTGACTGCC<br>A                      | 23S rRNA primer extension, 5' RACE and cRACE analyses                         |
| <b>LHO-124</b> | GCATGTGTTAGGCCTGCCGC                            | 16S rRNA primer extension, 5' RACE and cRACE analyses                         |
| <b>LHO-132</b> | GAACTCAGAAGTGAAACGCC<br>G                       | Sense PCR primer for 5S 3' RACE analysis                                      |
| <b>LHO-150</b> | CGGGTGTGTAAGCGCAGCG                             | Sense PCR primer for 23S 3' RACE analysis                                     |
| <b>LHO-203</b> | GCAAGTCGAACGGTAACAGG                            | PCR primer for 16S 5' end cRACE analysis                                      |
| <b>LHO-204</b> | CTGGTCGTAAGGGCCATGATG                           | 16S rRNA primer extension, cRACE analysis                                     |
| <b>LHO-205</b> | CAGGGCTACACACGTGCTAC                            | PCR primer for 16S 3' end cRACE analysis                                      |
| <b>LHO-206</b> | GACGTGCTAATCTGCGATAAG                           | PCR primer for 23S 5' end cRACE analysis                                      |
| <b>LHO-207</b> | CTTCAACGTTCTTCAGGACC                            | 23S rRNA primer extension, cRACE analysis                                     |
| <b>LHO-208</b> | GACGACGACGTTGATAGGCC                            | PCR primer for 23S 3' end cRACE analysis                                      |

1083

1084

1085 **Table S1. cRACE data.** (Excel file)

1086

1087 **Table S2. Mass spectrometry data.** (Excel file)

1088

1089

1090 **Figures with legends.**

1091

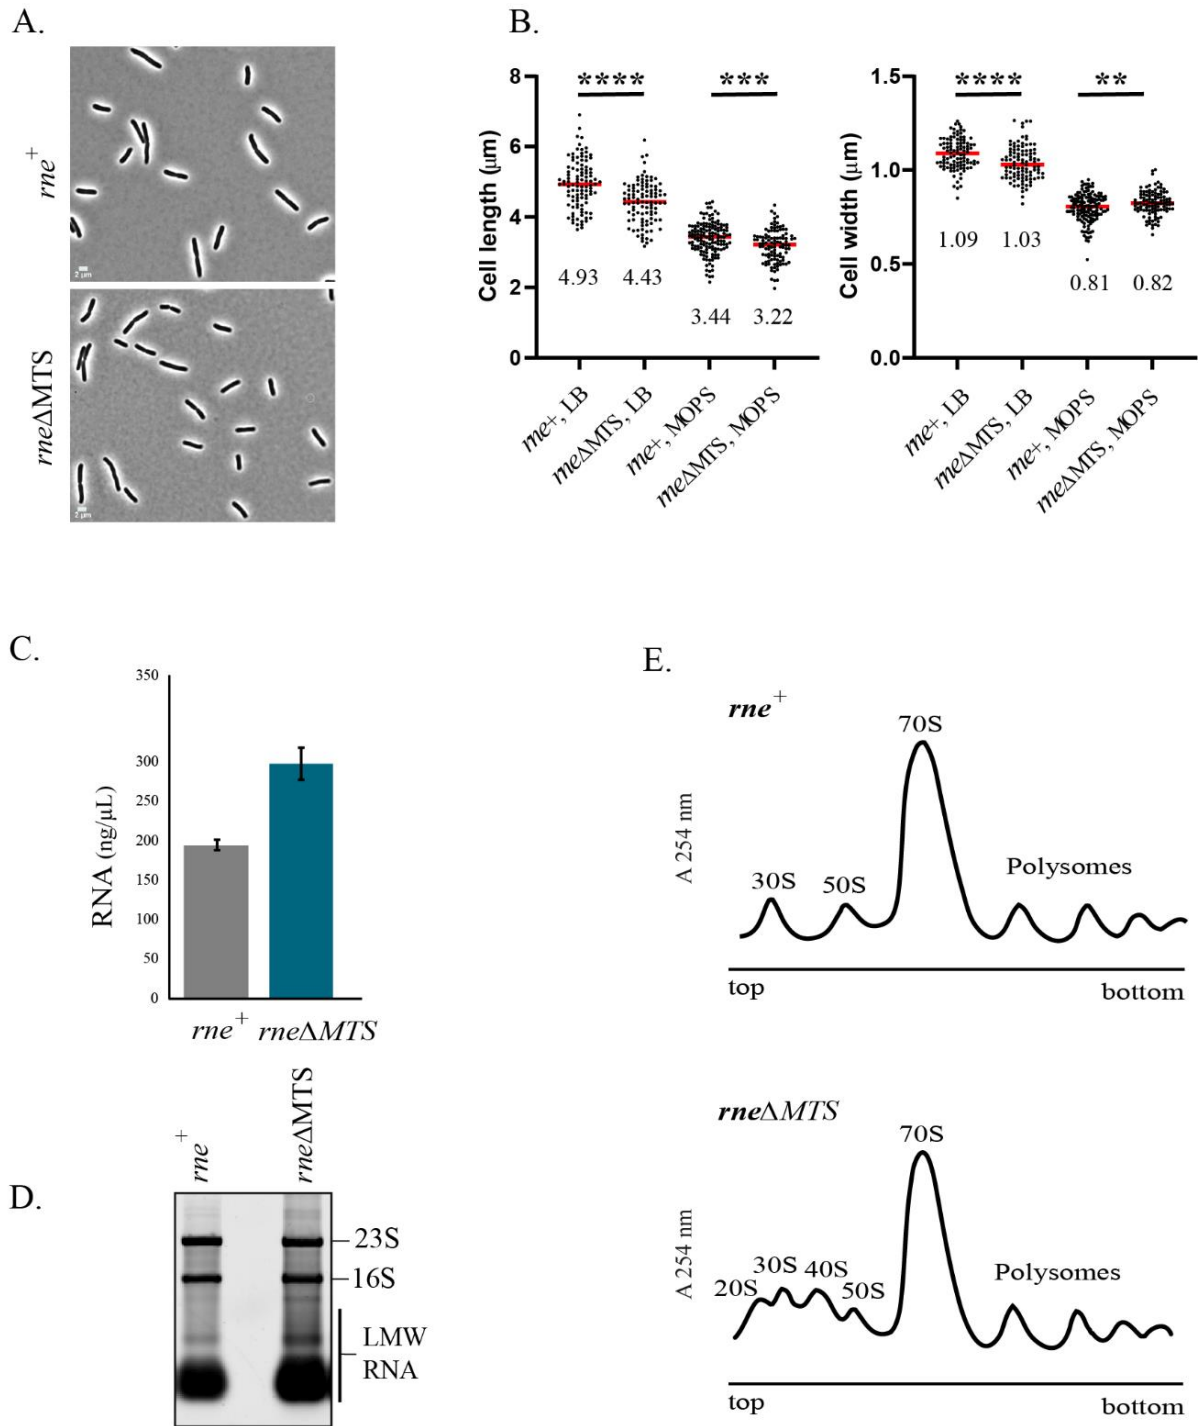

1092

1093

1094 **Fig. 1. Cell size, RNA content and polysome profiles.**

1095 **A.** Phase-contrast images. Micrographs of strains expressing either membrane-bound (*rne+*) or

1096 cytoplasmic (*rneΔMTS*) RNase E were made at the same magnification.

1097 **B. Cell size.** Lengths and widths were measured as described (Hamouche et al. 2021b). Scatter  
1098 plots showing median cell length and width of *rne*<sup>+</sup> and *rne*ΔMTS strains grown in either LB or  
1099 MOPS media. Cells from two independent experiments (n>100) were analyzed by Image J using  
1100 the MicrobeJ plugin. Median length and widths (μm) are shown below each plot. P-values were  
1101 calculated using a parametric unpaired t-test (GraphPad Prism): \*\*\*\* = P < 0.0001; \*\*\* = 0.0001 <  
1102 P < 0.001; \*\* = 0.001 < P < 0.01.

1103 **C. RNA yield.** Cultures of the *rne*<sup>+</sup> and *rne*ΔMTS strains were grown to OD<sub>600</sub>=0.4 in LB  
1104 medium. RNA was extracted from equal volumes of culture. Purified total RNA was eluted in  
1105 equal volumes of water and concentrations were determined by UV absorption at 260 nm. Average  
1106 and standard deviation of RNA concentration from three independent experiments are shown.

1107 **D. Ribosomal RNA levels.** Equal volumes of total RNA (Fig. 1C) separated by agarose gel  
1108 electrophoresis and staining with SybrGreen®. Levels of 16S and 23S are comparable in the two  
1109 strains, whereas there is 30% more Low Molecular Weight RNA (LMW RNA) in the *rne*ΔMTS  
1110 strain as estimated by quantification of fluorescence levels (Image Lab, Biorad).

1111 **E. Polysome profiles.** Clarified cell lysates prepared from equal volumes of cell cultures grown to  
1112 OD<sub>600</sub>=0.4 in LB medium were fractionated by velocity sedimentation on 10-40% sucrose  
1113 gradients. Sedimentation is from left to right. Upper panel, *rne*<sup>+</sup> strain; lower panel, *rne*ΔMTS  
1114 strain. Peaks corresponding to 30S and 50S ribosomal subunits, 70S ribosomes and polysomes are  
1115 indicated. 20S and 40S particles in the *rne*ΔMTS strain are indicated.

1116

A.

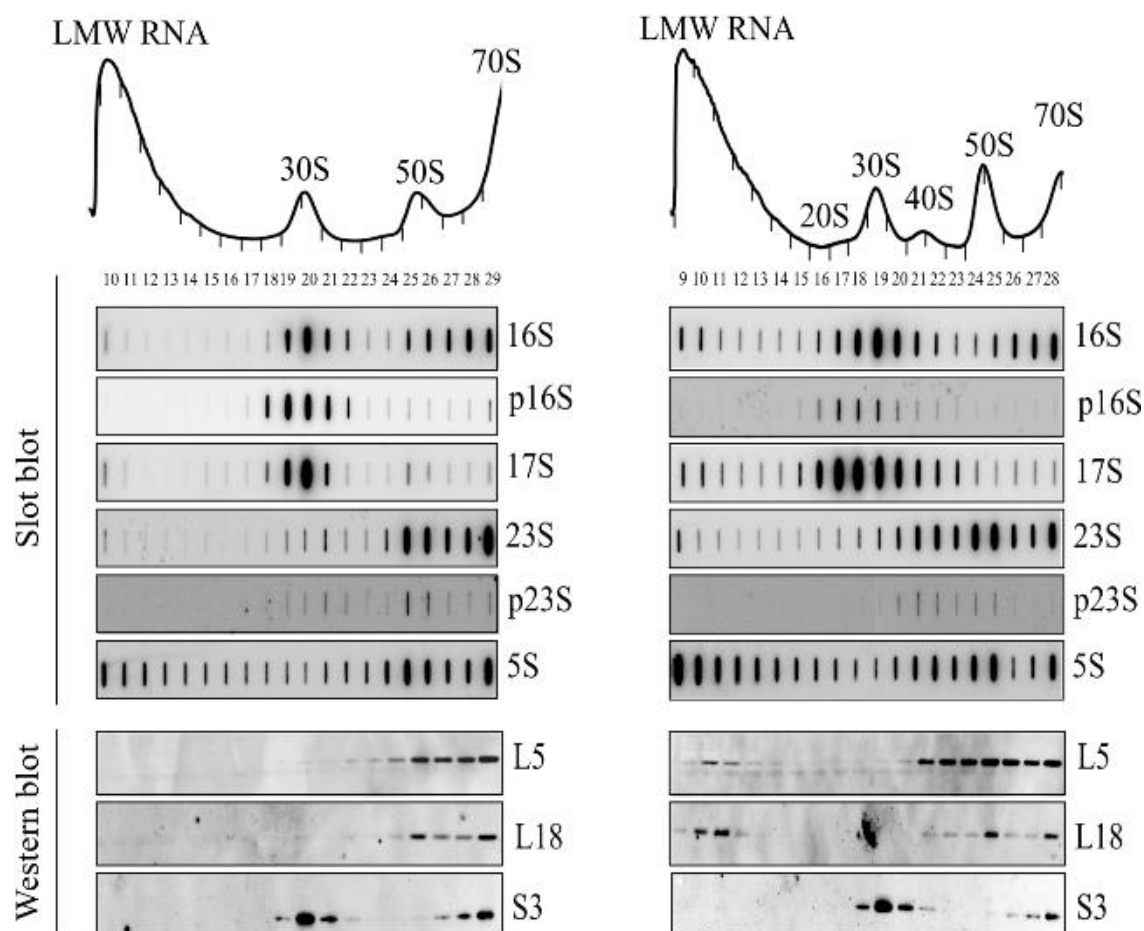

B.

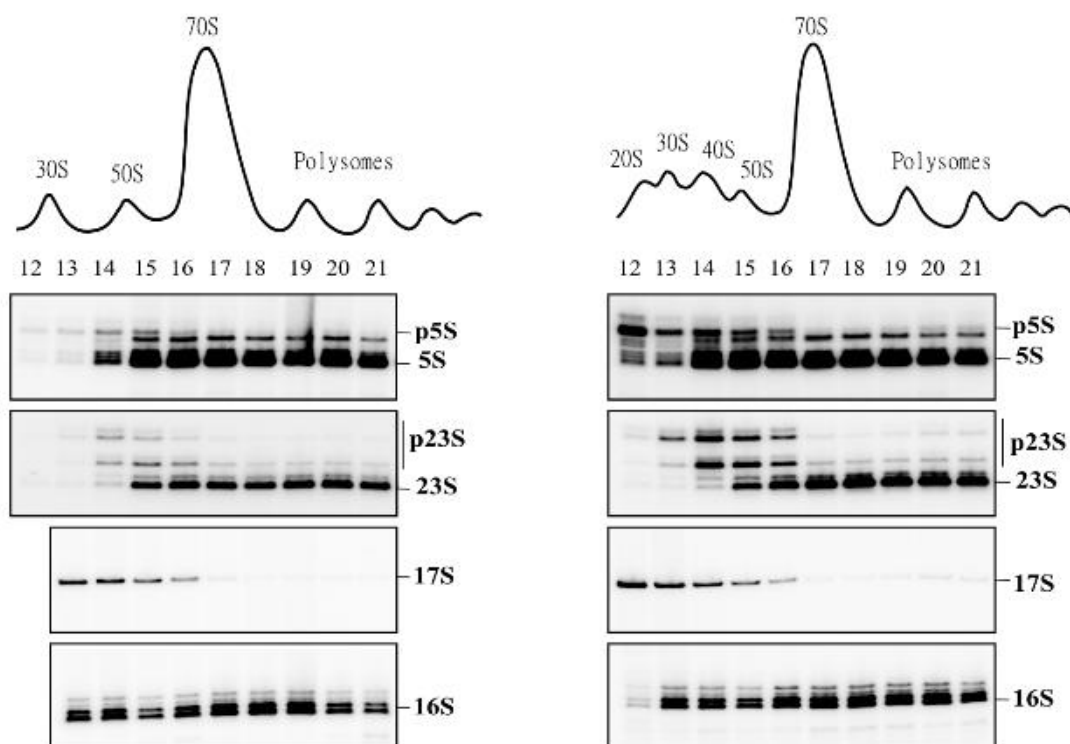

1117

1118

1119 **Fig. 2. RNA content of ribosomal particles.**

1120

1121 Equal volume of clarified cell lysates from *rne*<sup>+</sup> (left) and *rne*ΔMTS (right) strains were  
1122 fractionated by velocity sedimentation. Sucrose gradient fraction numbers are indicated below the  
1123 UV absorption profiles.

1124 **A.** Conditions optimized for separation in the range of 20S to 70S. RNA from the sucrose gradient  
1125 fractions was analyzed by slot blots using oligonucleotides specific to the RNA species indicated  
1126 to the left of each panel. Protein from the sucrose gradient fractions was analyzed by Western  
1127 blotting using antibodies against the ribosomal proteins indicated to the left of each panel.

1128 **B.** Conditions optimized for separation of ribosomal subunits and polyribosomes. RNA from the  
1129 sucrose gradient fractions was analyzed by primer extensions using [<sup>32</sup>P] end-labelled  
1130 oligonucleotides specific to the 5' ends of 5S, 23S, 17S and 16S rRNA. After extension by reverse  
1131 transcriptase, the products were separated by denaturing gel electrophoresis. The 5' end of mature  
1132 rRNA and that of the prominent precursors are indicated to the right of each panel.

1133



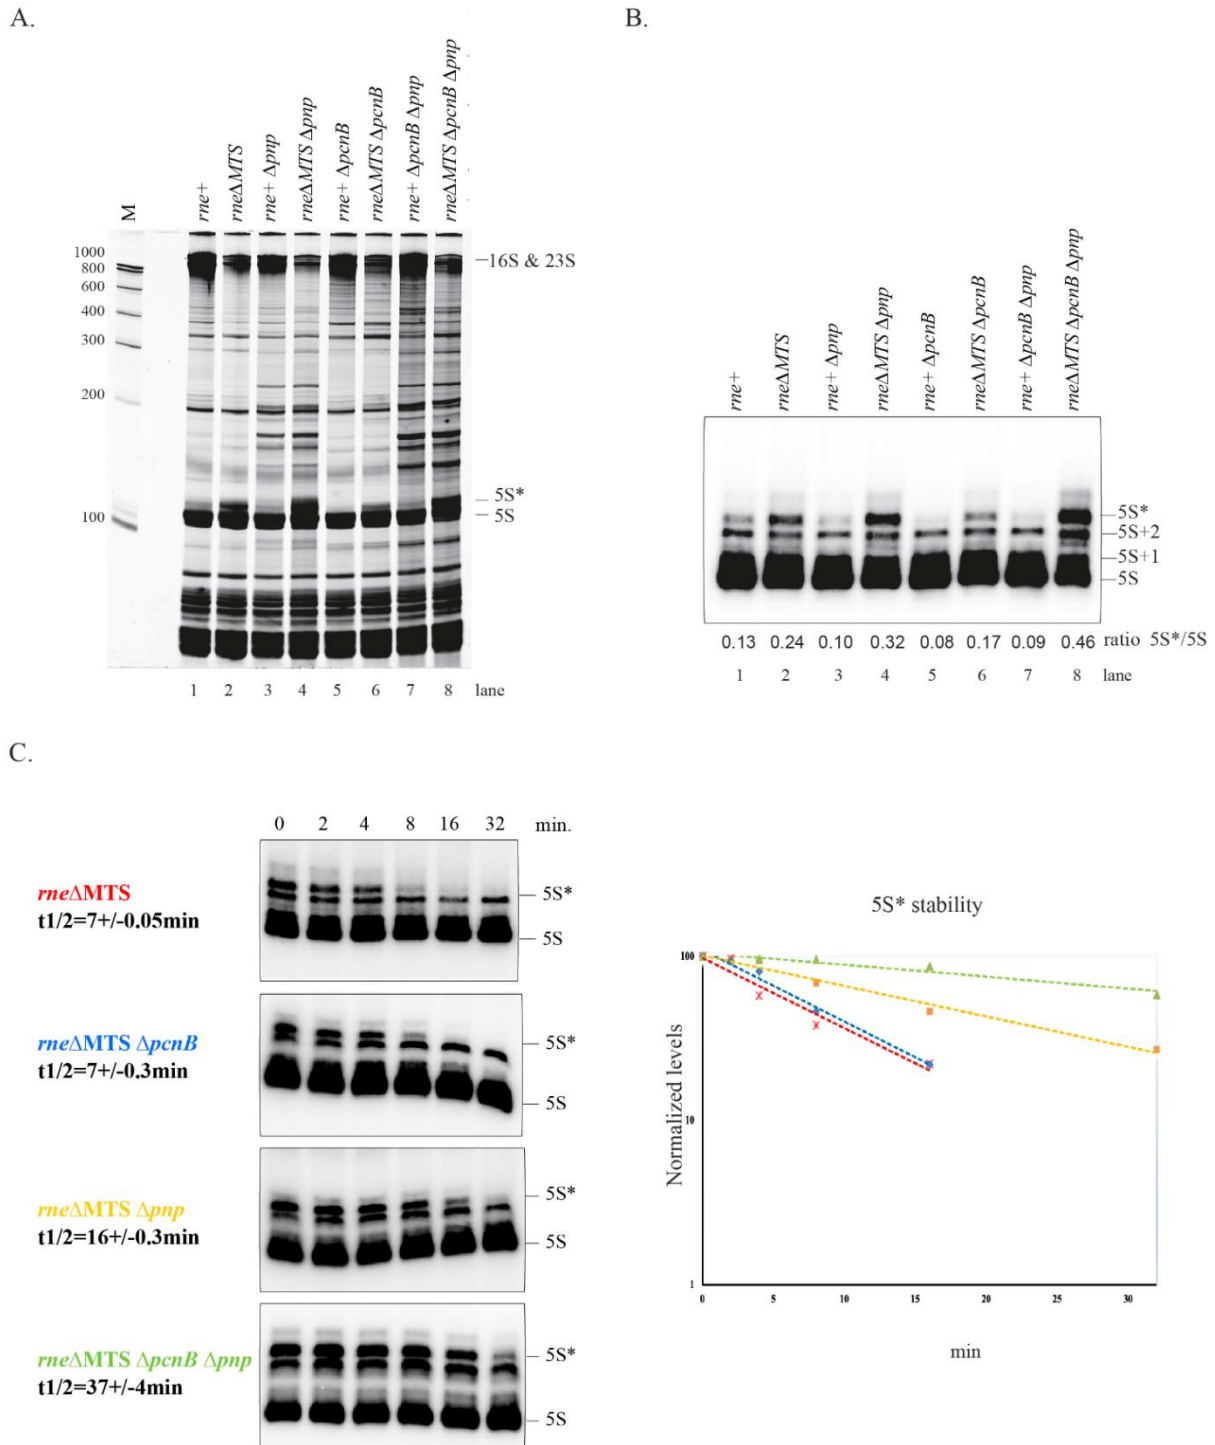

1134

1135

1136 **Fig. 3. 5S\* rRNA is oligoadenylated form of p5S rRNA.**

1137

1138 **A.** Total RNA (10  $\mu$ g) was extracted from strains that were grown in LB at 37  $^{\circ}$ C to  $OD_{600}=0.4$ ,  
 1139 separated on a denaturing polyacrylamide gel (10%, 7M urea) for 5h at 300V in 1x TBE, and then  
 1140 stained with SybrGreen dye.

1141 **B.** Total RNA (1  $\mu$ g) was analyzed by primer extension with a probe specific for 5S rRNA. The  
1142 position of mature 5S rRNA and its precursors are indicated on the right. The levels of 5S and 5S\*  
1143 were quantified by phosphorimaging. The 5S\*/5S ratio is indicated at the bottom of each lane.  
1144 **C.** The decay of 5S\* rRNA was measured after the inhibition of transcription by rifampicin (left  
1145 panel). Strains and half-lives are indicated to the left of each panel. Semi-log plot of quantification  
1146 by phosphoimaging used to calculate half-lives (right panel). Mean half-live and standard  
1147 deviation were determined from two or three independent experiments for each strain.  
1148  
1149

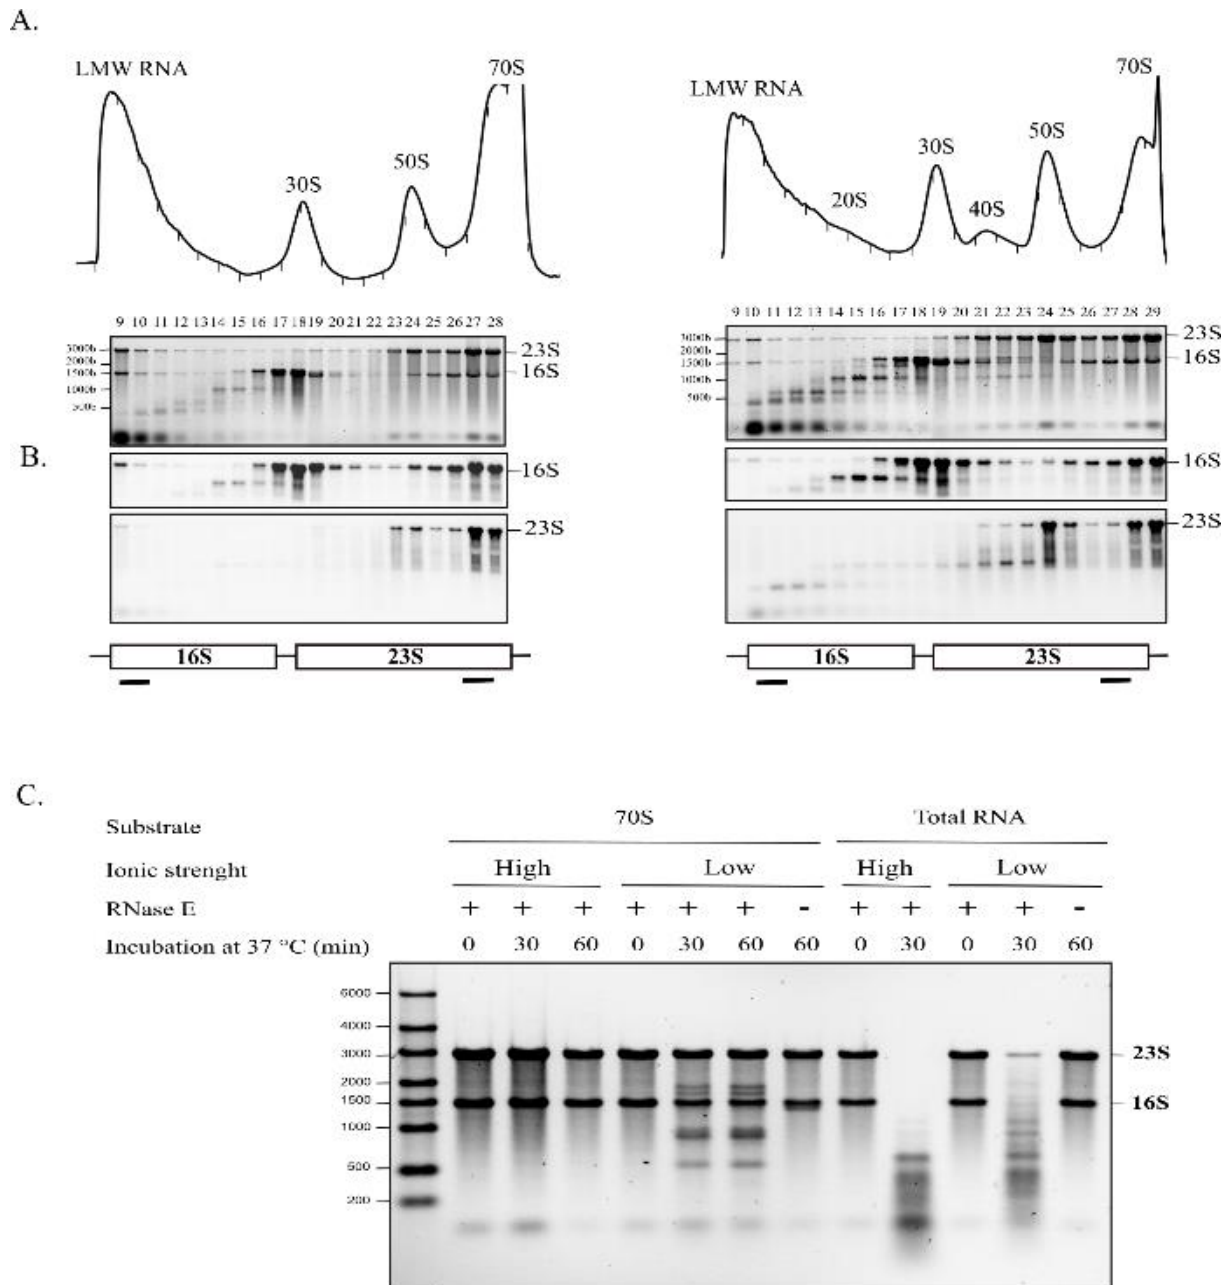

1150

1151

1152 **Fig. 4. Identification of 16S and 23S rRNA fragments.**

1153

1154 **A.** Equal volumes of cell lysates from the *rne<sup>+</sup> exo<sup>-</sup>* (left) and *rneΔMTS exo<sup>-</sup>* (right) strains were

1155 separated by velocity sedimentation 5 to 20% sucrose gradients. RNA from each fraction

1156 separated by gel electrophoresis.

1157 **B.** Northern blots with probes specific to the 5' end of 16S rRNA and the 3' end of 23S rRNA as

1158 indicated in the diagram at the bottom of each panel.

1159 **C.** Degradation of rRNA *in vitro*. RNase E cleavage assays were performed with purified 70S

1160 ribosomes or total RNA. A representative experiment is presented. After incubation at the

1161 indicated temperature and times, RNA was extracted, separated on 1% agarose gels and stained

1162 with SybrGreen. Each reaction contained 0.22  $\mu$ M 70S ribosome or rRNA and 0.3  $\mu$ M RNase E(1-  
1163 598)-HIS6. Control lanes without RNase E (-) were also included. The position of the 23S and 16S  
1164 rRNA are indicated to the right of the panel.

1165

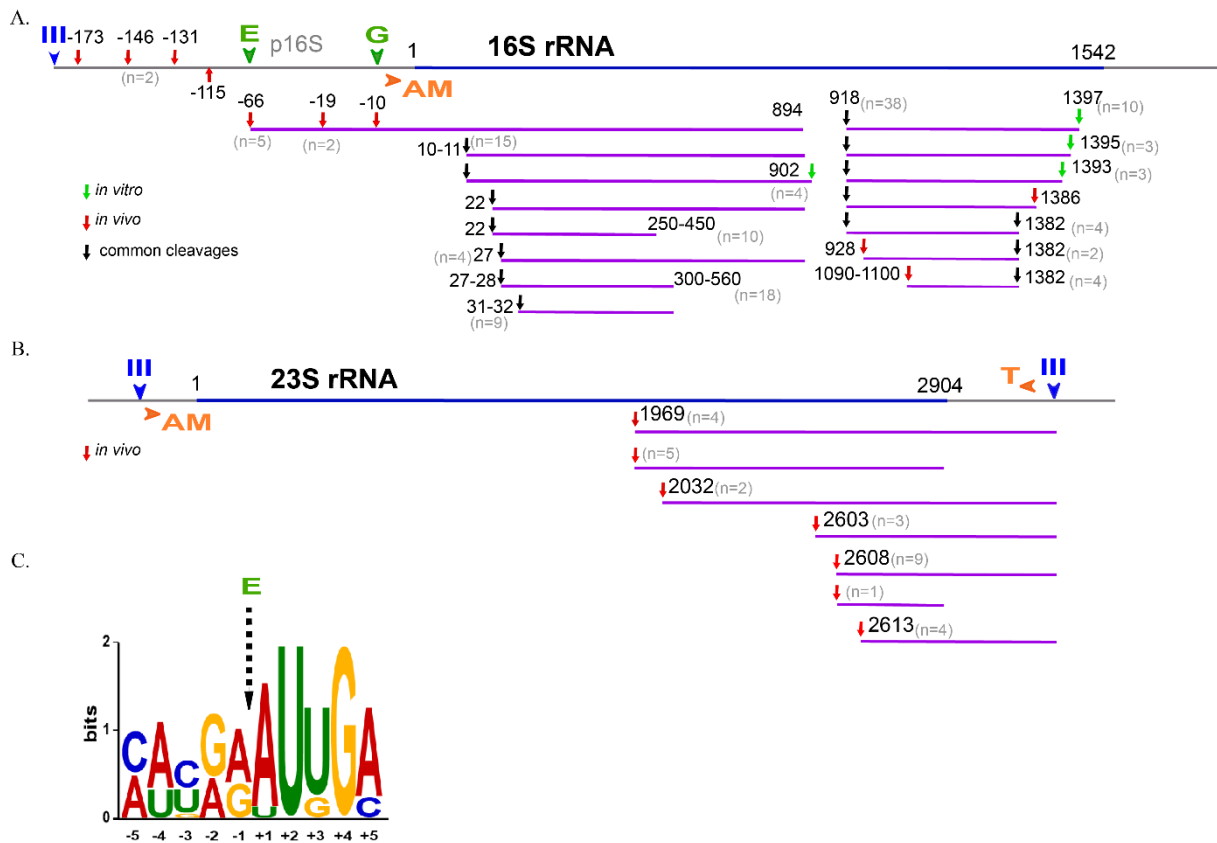

1166

1167

1168 **Fig. 5. Mapping of RNase E cleavage sites.**

1169

1170 RNA fragments from the gels in Fig. 4 were extracted, purified, circularized and the region  
 1171 containing the 3'-5' junction was PCR amplified (cRACE) as indicated in Fig. S6. After cloning  
 1172 the PCR fragments into a plasmid vector, the 3'-5' junction was sequenced and the ends aligned  
 1173 with the sequence of 16S or 23S rRNA. In the diagrams representing 16S and 23S rRNA, III  
 1174 (blue), E (green), G (green), AM (orange) and T (orange) represent, respectively, rRNA processing  
 1175 sites for RNase III, RNase E and RNase G, which are endoribonucleases and RNase AM and  
 1176 RNase T, which are exoribonucleases that trim intermediates to the final mature species.  
 1177 **A. and B.** Identification of cleavage sites in 16S rRNA and 23S rRNA. The color-coded key  
 1178 indicates cleavages that were mapped *in vivo*, *in vitro* or both *in vivo* and *in vitro*. The number of  
 1179 times a site was sequenced is indicated (n).

1180 **C.** Consensus sequence of rRNA cleavage sites that were mapped *in vivo*.

1181

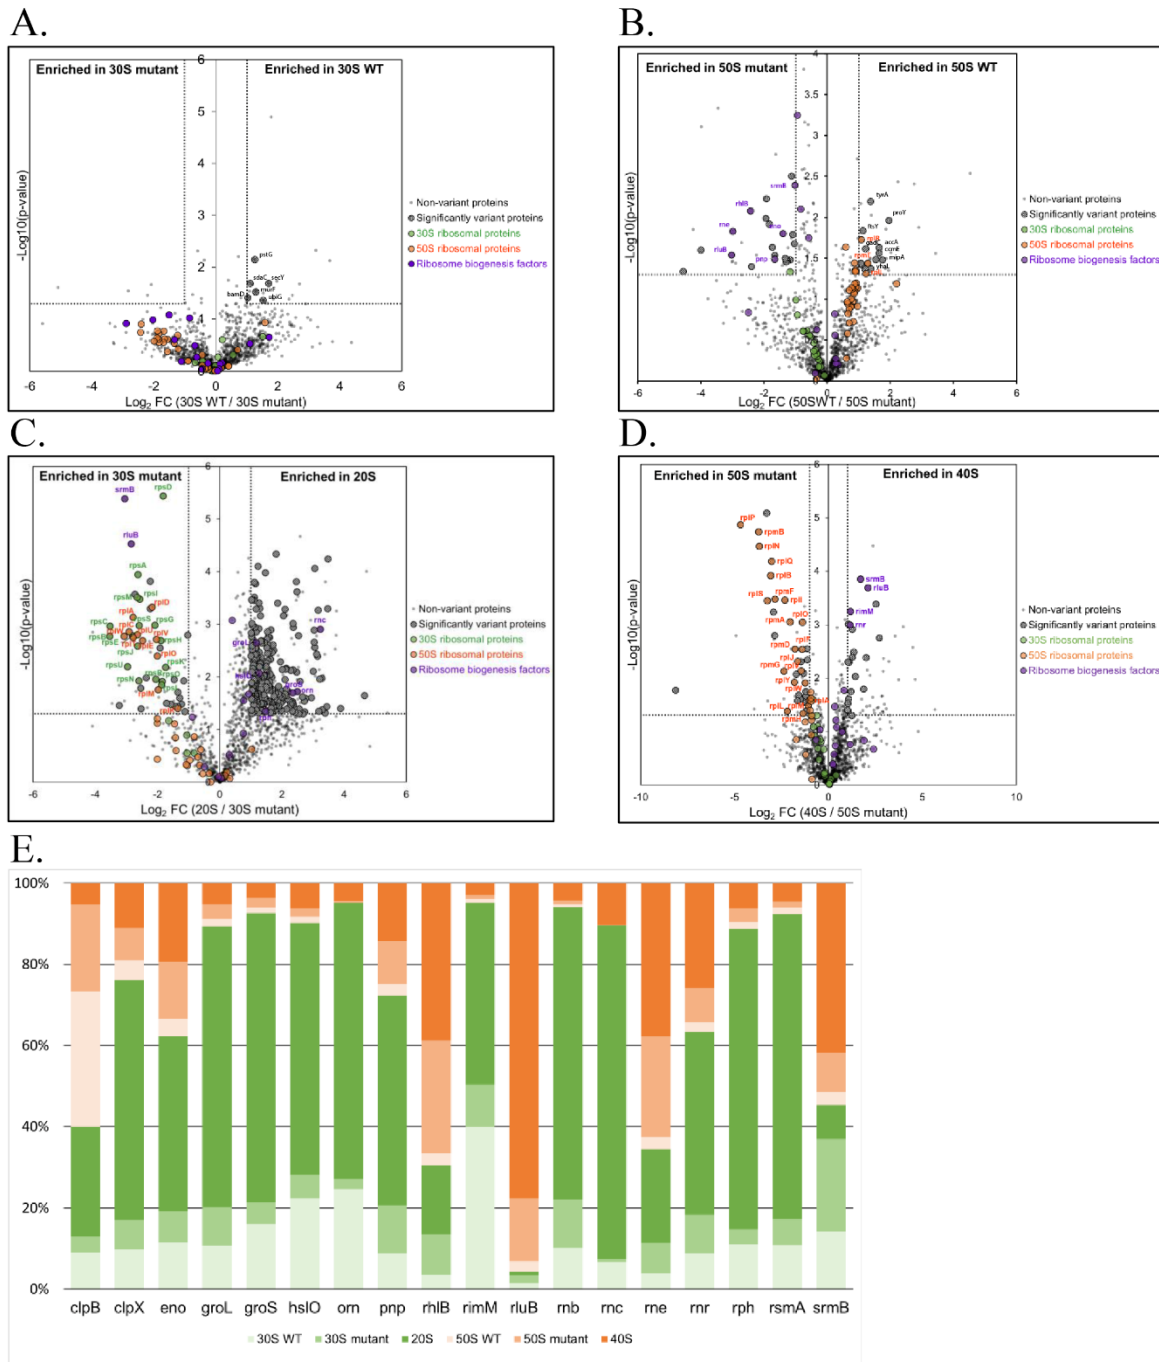

1182

1183

1184 **Fig. 6. Protein composition of aberrant intermediates in ribosome assembly.**

1185

1186 Protein content of the ribosomal particles from  $rne^+$  and  $rne\Delta\text{MTS}$  strains. Extracted proteins from  
 1187 sucrose gradient fractions were identified and quantified using a label-free quantitative mass  
 1188 spectrometry approach. Volcano plots showing significantly variant proteins (striped plots) in 30S  
 1189 particles from  $rne^+$  versus  $rne\Delta\text{MTS}$  strains (**A.**), in 50S particles from  $rne^+$  versus  $rne\Delta\text{MTS}$   
 1190 strains (**B.**), in 20S versus 30S particles from  $rne\Delta\text{MTS}$  strains (**C.**) and in 40S versus 50S  
 1191 particles from  $rne\Delta\text{MTS}$  strains (**D.**), are presented. An unpaired bilateral student t-test with equal

1192 variance was used. Variant significance thresholds are represented by an absolute log<sub>2</sub>-transformed  
1193 fold-change (FC) greater than 1 and a -log<sub>10</sub>-transformed (p-value) greater than 1.3 (see Materials  
1194 and Methods). Small subunit proteins (green), large subunit proteins (orange) and ribosome  
1195 biogenesis factors (purple) are indicated.

1196 **E.** Abundance levels of the quantified factors involved in ribosome biogenesis are represented as a  
1197 percentage in 30S particle from *rne*<sup>+</sup> strain (light green), in 30S particle from *rne*ΔMTS strain  
1198 (medium green), in 20S particle (dark green), 50S particle from *rne*<sup>+</sup> strain (light orange), in 50S  
1199 particle from *rne*ΔMTS strain (medium orange) and in 40S particle (dark orange).

1200

1201

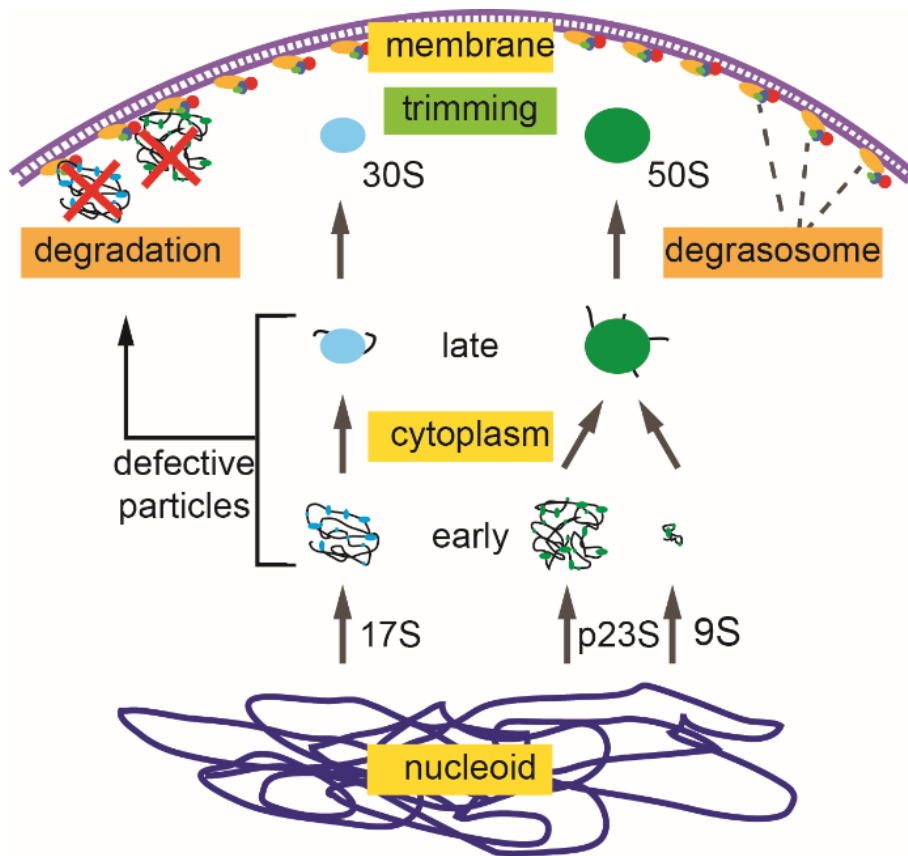

1202

1203

1204 **Fig. 7. Quality control of ribosome assembly by the membrane attached RNA degradosome.**

1205

1206 Cartoon depicting the synthesis of rRNA in the nucleoid, the release of early intermediates in  
1207 ribosome assembly from nucleoid, maturation of late intermediates in the cytoplasm, and trimming  
1208 of 17S and 9S rRNA by the membrane attached RNA degradosome. Defective ribosomal particles  
1209 are degraded by the membrane attached RNA degradosome. In this model, compartmentalization  
1210 of ribosome assembly to the interior of the cell and the RNA degradosome on the inner  
1211 cytoplasmic membrane shields intermediates in ribosome assembly from degradation thus  
1212 avoiding wasteful turnover of rRNA. Defective particles can be either newly synthesized  
1213 intermediates that have failed to properly fold or mature ribosomal subunits that are inactive (see  
1214 Discussion).

1215



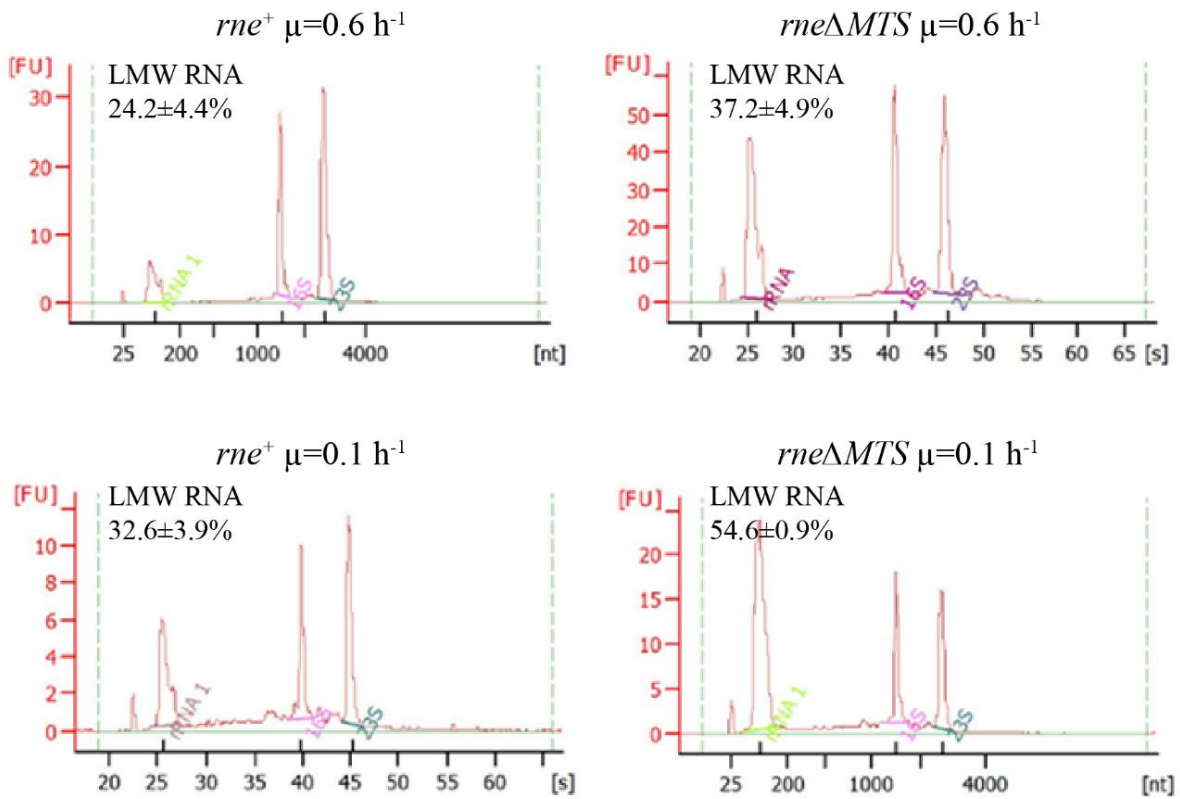

1216

1217

1218 **Fig. S1. Bioanalyzer analyses of total RNA preparations.**

1219

1220 Electrophoretograms of total RNA isolated from cultures grown in minimal glucose medium at  
1221 fast ( $\mu=0.6 \text{ h}^{-1}$ ) and slow ( $\mu=0.1 \text{ h}^{-1}$ ) growth rates. RNA levels were measured by fluorescence  
1222 (FU) and elution was expressed either as seconds (s) or size (nt). The level of RNA in the peak  
1223 centered at 100 nt was quantified as the percentage of total RNA. Under both fast and slow growth  
1224 conditions, there was an approximately 60% increase in the level of Low Molecular Weight  
1225 (LMW) RNA in the *rne* $\Delta$ MTS strain suggesting an accumulation of RNA degradation products.

1226

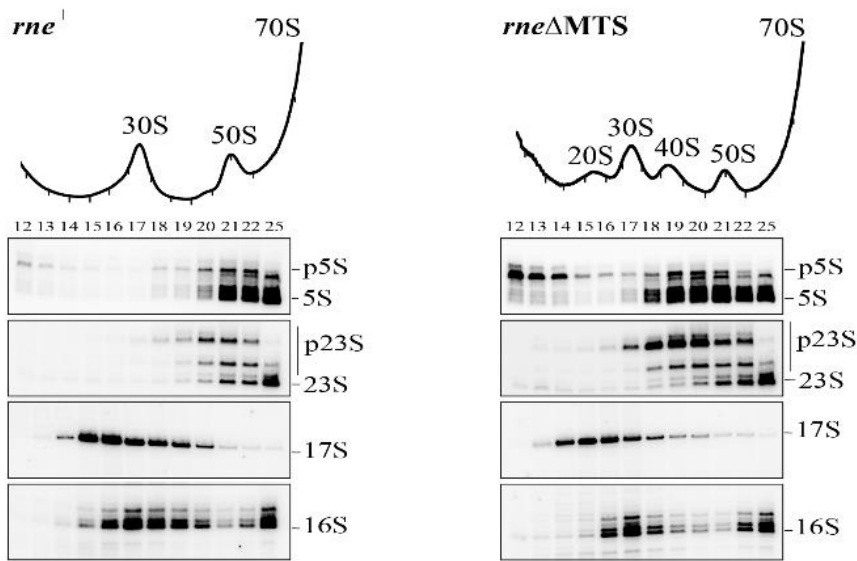

1227

1228

1229 **Fig. S2. Ribosomal RNA 5' end mapping by primer extension.**

1230

1231 Equal volume of clarified cell lysates from *rne*<sup>+</sup> (left) and *rne*ΔMTS (right) strains were  
1232 fractionated by velocity sedimentation under condition that optimized separation in the range of 5S  
1233 to 70S. RNA from the sucrose gradient fractions was analyzed by primer extensions using [<sup>32</sup>P]  
1234 end-labelled oligonucleotides specific to the 5' ends of 5S, 23S, 17S and 16S rRNA. After  
1235 extension by reverse transcriptase, the products were separated by denaturing gel electrophoresis.  
1236 The 5' end of mature rRNA and that of the prominent precursors are indicated to the right of each  
1237 panel. Band located between the p5S and 5S ends correspond to the 5S+1 and 5S+2 species.

1238

1239

A.

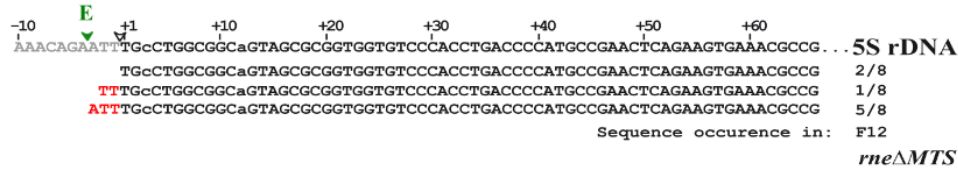

B.

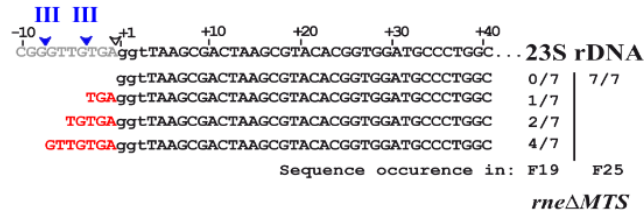

C.

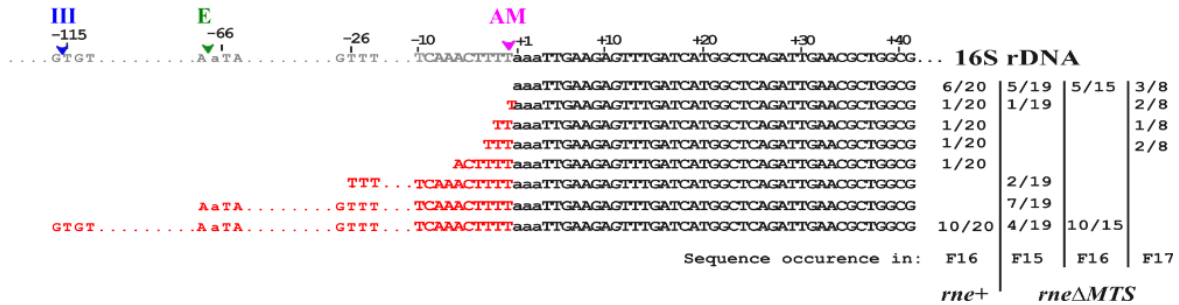

1240

1241

1242 **Fig. S3. Mapping of rRNA 5' ends by RACE.**

1243

1244 RNA from sucrose gradient fractions (Fig. 2A) was analyzed by linker ligation to the RNA 5' end,

1245 PCR amplification and DNA sequencing (5' RACE). 5' ends were aligned with the sequence of

1246 16S or 23S rRNA from the *E. coli rrfB* operon. 5' extensions are indicated in red. Ribosomal RNA

1247 processing sites are indicated by arrows: RNase III, blue; RNase E, green; RNase AM, pink. The

1248 number of times each sequence was detected is indicated on the right. **A.** 5S rRNA, **B.** 23S rRNA

1249 and **C.** 16S rRNA.

1250

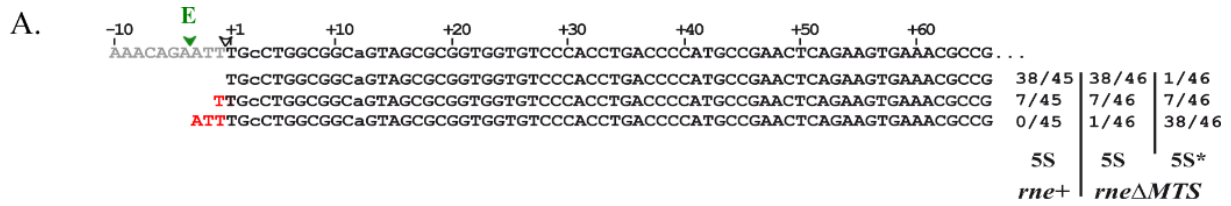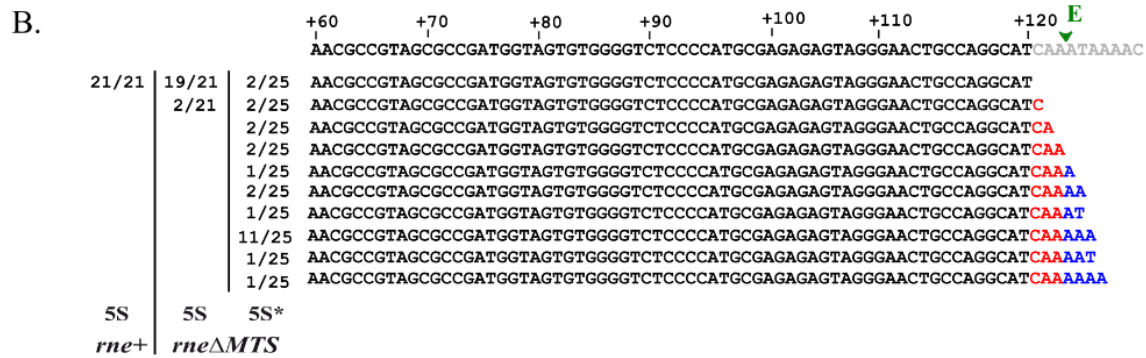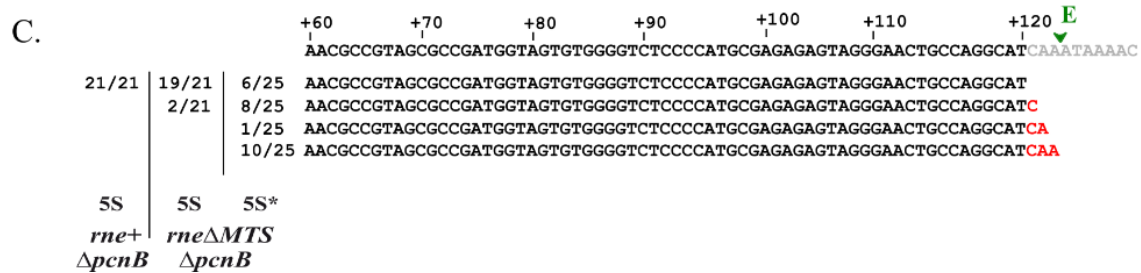

1251

1252

1253 **Fig. S4. Mapping of 5S and 5S\* 3' ends by RACE.**

1254

1255 5S and 5S\* rRNA species were extracted from the gel shown in Fig. 3A and subjected to 5' and  
 1256 3'RACE analysis. Reference sequences are from the *E. coli rrfB* operon. 5' and 3' extensions are  
 1257 indicated in red; untemplated extension in blue. RNase E processing sites are indicated by the  
 1258 green arrow. The occurrence for each sequence is summarized on the right (3' RACE) or left side  
 1259 (5' RACE).

1260 **A.** 5' end analysis of 5S\* rRNA. 5' RACE on 5S and 5S\* rRNAs from *rne*Δ*MTS* strain. For  
 1261 comparison, 5S rRNA from *rne*<sup>+</sup> strain was processed in parallel.

1262 **B.** 3' end analysis of 5S\* rRNA. 3' RACE on 5S and 5S\* rRNAs from *rne*Δ*MTS* strain. For  
 1263 comparison, 5S rRNA from *rne*<sup>+</sup> strain was processed in parallel.

1264 **C.** As in **B.** except in the *ΔpcnB* strain background.

**A.**

|     |                |                                                                   |                                                                   |     |     |      |      |      |          |
|-----|----------------|-------------------------------------------------------------------|-------------------------------------------------------------------|-----|-----|------|------|------|----------|
|     |                | +60                                                               | +70                                                               | +80 | +90 | +100 | +110 | +120 | <b>E</b> |
|     | <b>5S rDNA</b> | AACGCCGTAGCGCCGATGGTAGTGTGGGGTCTCCCCATGCGAGAGAGTAGGGAACTGCCAGGCAT | CAAATAAAAC                                                        |     |     |      |      |      |          |
| 5/8 |                | 1/8                                                               | AACGCCGTAGCGCCGATGGTAGTGTGGGGTCTCCCCATGCGAGAGAGTAGGGAACTGCCAGGCAT |     |     |      |      |      |          |
|     |                | 1/8                                                               | AACGCCGTAGCGCCGATGGTAGTGTGGGGTCTCCCCATGCGAGAGAGTAGGGAACTGCCAGGCAT |     |     |      |      |      |          |
| 2/8 |                | 1/8                                                               | AACGCCGTAGCGCCGATGGTAGTGTGGGGTCTCCCCATGCGAGAGAGTAGGGAACTGCCAGGCAT |     |     |      |      |      |          |
|     |                | 3/8                                                               | AACGCCGTAGCGCCGATGGTAGTGTGGGGTCTCCCCATGCGAGAGAGTAGGGAACTGCCAGGCAT |     |     |      |      |      |          |
|     |                | 1/8                                                               | AACGCCGTAGCGCCGATGGTAGTGTGGGGTCTCCCCATGCGAGAGAGTAGGGAACTGCCAGGCAT |     |     |      |      |      |          |
|     |                | 1/8                                                               | AACGCCGTAGCGCCGATGGTAGTGTGGGGTCTCCCCATGCGAGAGAGTAGGGAACTGCCAGGCAT |     |     |      |      |      |          |

*rne+* | *rne* $\Delta$ MTS

**B.**

|       |  |                                                                               |                                                |  |  |  |  |  |  |
|-------|--|-------------------------------------------------------------------------------|------------------------------------------------|--|--|--|--|--|--|
|       |  | <b>23S rDNA</b> ATGCGTTGAGCTAACCGGTACTAATGAACCGTGAGGCTTAACcettACAACGCCGAAGCTG |                                                |  |  |  |  |  |  |
| 8/34  |  | ATGCGTTGAGCTAACCGGTACTAATGAACCGTGAGGCTTAACcett                                |                                                |  |  |  |  |  |  |
|       |  | 3/42                                                                          | ATGCGTTGAGCTAACCGGTACTAATGAACCGTGA             |  |  |  |  |  |  |
| 4/34  |  | 2/42                                                                          | ATGCGTTGAGCTAACCGGTACTAATGAACCGTGAGGCTTAACcett |  |  |  |  |  |  |
|       |  | 3/34                                                                          | ATGCGTTGAGCTAACCGGTACTAATGAACCGTGAGGCTTAACcett |  |  |  |  |  |  |
|       |  | 5/42                                                                          | ATGCGTTGAGCTAACCGGTACTAATGAACCGTGAGGCTTAACcett |  |  |  |  |  |  |
| 3/34  |  | ATGCGTTGAGCTAACCGGTACTAATGAACCGTGAGGCTTAACcett                                |                                                |  |  |  |  |  |  |
| 16/34 |  | 16/42                                                                         | ATGCGTTGAGCTAACCGGTACTAATGAACCGTGAGGCTTAACcett |  |  |  |  |  |  |
|       |  | 13/42                                                                         | ATGCGTTGAGCTAACCGGTACTAATGAACCGTGAGGCTTAACcett |  |  |  |  |  |  |
|       |  | 2/42                                                                          | ATGCGTTGAGCTAACCGGTACTAATGAACCGTGAGGCTTAACcett |  |  |  |  |  |  |
|       |  | 1/42                                                                          | ATGCGTTGAGCTAACCGGTACTAATGAACCGTGAGGCTTAACcett |  |  |  |  |  |  |

*rne+* | *rne* $\Delta$ MTS

1265

1266

1267 **Fig. S5. Mapping of rRNA 3' ends by RACE.**

1268

1269 RNA from sucrose gradient fractions (Fig. 2A) was analyzed by linker ligation to the RNA 3' end,  
 1270 PCR amplification and DNA sequencing (3' RACE). 3' ends were aligned with the sequence of 5S  
 1271 or 23S rRNA from the *E. coli rrfB* operon. 3' extensions are indicated in red; untemplated A  
 1272 additions in blue. 5S rRNA (**A.**) and 23S rRNA (**B.**) from the 50S subunit (*rne*<sup>+</sup>) and 40S particle  
 1273 (*rne* $\Delta$ MTS).

1274

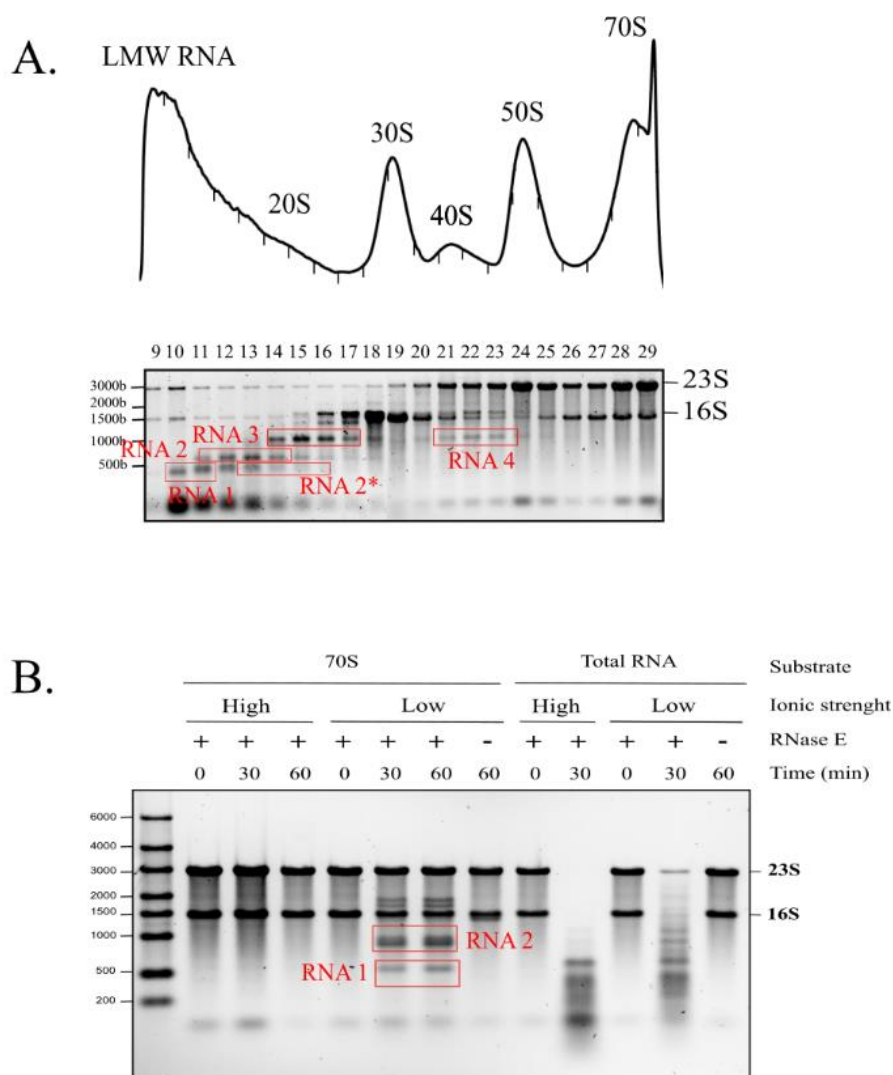

1275

1276

1277 **Fig. S6. Analysis of rRNA fragments by cRACE.**

1278

1279 Markup of gels shown in Fig. 4A showing bands that were excised for RNA extraction and

1280 cRACE analysis. After RNA circularization, cDNA copies corresponding to the junction of the 5'

1281 and 3' ends were gel purified and cloned into a plasmid vector. The 5'-3' ends were then identified

1282 by sequencing the cloned cDNA fragments. **A.** *In vivo* fragments. **B.** *In vitro* fragments.

1283
